# Supplementary material for: Integrated Analysis of Gene Expression, CpG Island Methylation, and Gene Copy Number in Breast Cancer Cells by Deep Sequencing
Source: PLoS One. 2011 Feb 25;6(2):e17490. doi: 10.1371/journal.pone.0017490 (PMC3045451; doi:10.1371/journal.pone.0017490)
Supplement: Table S1 — Differential analysis results for mRNA-seq data. It contains 1,873 genes passing our filtering criteria with log2 fold change, p value, and false discovery rate q value. (XLSX) [file pone.0017490.s001.xlsx]

## Sheet: P<0.05
Gene.Chr	log2FC ER+/ER-	p-value	q-value
PDZRN3.3	9.54736	2.38387e-08	0.00019296
TFF3.21	12.3929	6.38579e-08	0.000259037
RPS6KA6.x	8.53685	1.65849e-07	0.000448619
C6orf97.6	8.62367	4.10122e-07	0.000831025
PLCB1.20	9.68136	6.0046e-07	0.00091268
MAPT.17	6.00198	7.63951e-07	0.00091268
ERBB4.2	9.73242	7.87827e-07	0.00091268
KIAA1324.1	6.23095	9.74767e-07	0.00098811
POPDC3.6	-7.42285	1.98505e-06	0.00179267
APOBEC3C.22	-6.10827	6.70973e-06	0.00544018
CADM1.11	10.0691	1.09139e-05	0.00729681
GRIK3.1	10.5674	1.1437e-05	0.00729681
GREB1.2	9.04753	1.16922e-05	0.00729681
TLR6.4	-6.08401	1.53494e-05	0.00870212
SLC9A2.2	6.20318	1.60933e-05	0.00870212
ROR1.1	-7.29286	1.88366e-05	0.00927866
AGR3.7	9.33169	1.99516e-05	0.00927866
PREX1.20	6.1816	2.05711e-05	0.00927866
NKD2.5	6.92575	2.20561e-05	0.00928316
ADRA2A.10	7.8674	2.2902e-05	0.00928316
GBP1.1	-6.12869	2.68243e-05	0.00978914
KCNK15.20	8.79551	2.91792e-05	0.00978914
F3.1	-6.19629	2.99543e-05	0.00978914
DEGS2.14	8.22513	3.04328e-05	0.00978914
RDHE2.8	8.10455	3.14131e-05	0.00978914
PGR.11	12.0722	3.22615e-05	0.00978914
GNAO1.16	-4.91375	3.26109e-05	0.00978914
GLUD2.x	5.95772	3.45027e-05	0.00985985
AR.x	8.77768	3.58634e-05	0.00985985
LIPG.18	-6.51411	3.70352e-05	0.00985985
CGREF1.2	6.77934	3.76506e-05	0.00985985
IGSF9B.11	7.07659	4.03808e-05	0.0101583
UPP1.7	-4.35814	4.13514e-05	0.0101583
RASGRP3.2	-4.67771	4.26096e-05	0.0101583
GPR77.19	7.28016	4.62972e-05	0.0107251
STAC.3	-9.12136	5.29995e-05	0.0119361
DNAJA4.15	7.39359	5.52627e-05	0.0121175
TFF1.21	11.7219	5.84797e-05	0.0124814
AMPH.7	5.07664	6.33354e-05	0.0131592
MPPED2.11	7.07793	6.59887e-05	0.0133775
ICAM1.19	-4.50392	7.32253e-05	0.0140649
TM7SF2.11	3.50041	7.53931e-05	0.0140649
BDKRB2.14	5.45599	7.62285e-05	0.0140649
SIRPB1.20	-5.02919	7.78259e-05	0.0140649
CACNA1H.16	9.00271	7.90489e-05	0.0140649
NOVA1.14	7.05646	7.98408e-05	0.0140649
CXCL12.10	10.1689	8.83698e-05	0.0146237
PUNC.15	7.12656	8.92892e-05	0.0146237
ACSL4.x	-5.51435	9.05878e-05	0.0146237
TPO.2	4.67836	9.10835e-05	0.0146237
IGF2BP3.7	-7.03922	9.25655e-05	0.0146237
SOX2.3	6.61255	9.60667e-05	0.0146237
FOXN1.17	5.31175	9.73918e-05	0.0146237
SAMD9L.7	-5.15812	9.74075e-05	0.0146237
SH3TC2.5	-4.70945	0.000101359	0.0149032
CEACAM5.19	7.11086	0.000102938	0.0149032
HS6ST3.13	5.85053	0.000110209	0.0156759
ACN9.7	-6.33882	0.000117374	0.0164072
SEPT5.22	3.39928	0.00012668	0.0171213
MAML2.11	-3.82841	0.000128093	0.0171213
TRH.3	5.43813	0.000128818	0.0171213
MMP17.12	3.96946	0.000131479	0.0171931
DOCK3.3	-3.41496	0.000148273	0.0188279
MYRIP.3	6.99099	0.000148625	0.0188279
TNFRSF18.1	4.75997	0.000158134	0.0194541
IL8.4	-6.32563	0.000158367	0.0194541
NLRC5.16	-2.72671	0.000179471	0.0217175
NPY1R.4	6.91798	0.000188537	0.0224791
KCNJ11.11	3.57482	0.000199494	0.0234407
MT2A.16	-3.97852	0.000204509	0.0236867
DLG2.11	7.26569	0.000212215	0.0242331
IL15.4	-3.33686	0.000231252	0.0256852
BCAM.19	2.94716	0.000231934	0.0256852
COTL1.16	-3.71916	0.000237751	0.0256852
UBA7.3	-4.10954	0.000238273	0.0256852
P2RY5.13	5.63048	0.000240772	0.0256852
CHI3L2.1	-4.85692	0.00025143	0.0264738
ARX.x	5.61325	0.000263031	0.0272158
AGR2.7	11.2414	0.00026546	0.0272158
STARD10.11	3.41986	0.000270383	0.0272158
ETS1.11	-9.85332	0.000271904	0.0272158
C20orf134.20	4.74231	0.000279155	0.0274622
KIAA2022.x	6.38862	0.00028114	0.0274622
RHOB.2	3.21115	0.000285438	0.0275501
GRIN1.9	3.18189	0.000294491	0.0278995
CDC42EP3.2	-4.64773	0.00029594	0.0278995
PLAUR.19	-3.90048	0.000309216	0.0283039
MYO7B.2	-5.3034	0.000316963	0.0283039
XBP1.22	3.26352	0.000318304	0.0283039
RELB.19	-2.85755	0.00032063	0.0283039
CDC14B.9	-2.31439	0.000322057	0.0283039
LIN7A.12	7.47767	0.000323227	0.0283039
PLSCR4.3	-3.63978	0.00032617	0.0283039
AMZ1.7	6.96326	0.00032855	0.0283039
CACNG4.17	9.38288	0.00033165	0.0283039
ASTN2.9	2.77352	0.000400392	0.033401
PRRT2.16	3.4354	0.000402022	0.033401
PSMB9.6	-3.57836	0.000403734	0.033401
SCIN.7	6.1951	0.000417513	0.0341921
CDH13.16	5.10381	0.000437285	0.0354532
CLUAP1.16	1.85514	0.000468669	0.0371298
PHLDB2.3	-3.55223	0.00046929	0.0371298
ARHGAP29.1	-2.76978	0.000471704	0.0371298
GSC.14	5.73951	0.00048102	0.03737
FAM65C.20	3.64161	0.000485796	0.03737
ETV5.3	-4.74474	0.000502343	0.03737
GLT25D1.19	-2.1107	0.000503536	0.03737
CAPN9.1	5.55086	0.000504128	0.03737
CD44.11	-4.31698	0.000507846	0.03737
SCUBE2.11	7.28998	0.000508661	0.03737
LOC196993.15	4.60715	0.000511629	0.03737
APOL6.22	-5.00531	0.000528329	0.0382452
POF1B.x	7.16283	0.000547589	0.0389903
VPS37D.7	3.05322	0.00054824	0.0389903
BFSP2.3	6.14096	0.000561023	0.0394279
ZNF502.3	-6.04278	0.00056412	0.0394279
CCDC82.11	-3.54125	0.000585095	0.0405444
FRAT1.10	2.3884	0.000590974	0.0406048
ANKH.5	-3.92879	0.000601566	0.0409852
SLC16A6.17	3.10465	0.000610425	0.0410486
PADI1.1	-5.47573	0.00061457	0.0410486
SLC25A29.14	2.4349	0.000625197	0.0410486
ZNF34.8	2.01386	0.000626136	0.0410486
NAP1L2.x	6.77391	0.000627812	0.0410486
FLJ14213.11	-5.27499	0.000632978	0.0410553
SLC27A6.5	5.48139	0.000641914	0.0413044
ADAMTS19.5	7.38647	0.000649586	0.041469
TGFB3.14	5.87537	0.000659782	0.0416458
RHBG.1	3.51375	0.000662629	0.0416458
LOC134121.5	5.56061	0.000679759	0.0423938
EGFR.7	-5.48302	0.000685194	0.0424065
EMP1.12	-4.89512	0.000711122	0.0431043
GCNT2.6	-5.24517	0.000721564	0.0431043
OAF.11	-3.60276	0.000730017	0.0431043
NME3.16	2.13808	0.000732782	0.0431043
OBFC2A.2	-2.29976	0.000733128	0.0431043
UBASH3B.11	-6.90709	0.000733417	0.0431043
CSF1R.5	-3.94016	0.000733685	0.0431043
SRPX2.x	-4.9441	0.000749103	0.0435593
CENTD3.5	-4.12703	0.00075377	0.0435593
HEY2.6	4.79383	0.000757546	0.0435593
C6orf145.6	-3.92488	0.000789067	0.0446216
MT1E.16	-8.51762	0.000799183	0.0446216
NKAIN1.1	6.88018	0.000801507	0.0446216
CRIP2.14	5.16277	0.000819532	0.0446216
SCNN1G.16	5.20456	0.000821272	0.0446216
DLL1.6	5.01092	0.000822444	0.0446216
MSN.x	-8.23475	0.000822805	0.0446216
CASP1.11	-5.95258	0.000823231	0.0446216
EML1.14	6.33942	0.000825555	0.0446216
SEPHS2.16	1.69768	0.000836692	0.0446525
ABCC8.11	5.88865	0.00084498	0.0446525
KIAA1257.3	4.75521	0.000845116	0.0446525
TMEM47.x	5.53089	0.000853437	0.0446525
LEPREL1.3	-5.51608	0.000853665	0.0446525
ZNF662.3	-3.95357	0.000861657	0.0447817
AAK1.2	-2.10798	0.000895157	0.0459603
COL14A1.8	5.23879	0.000895839	0.0459603
AFAP1L1.5	-5.41274	0.000905119	0.0459603
CLIC5.6	-5.17282	0.000907011	0.0459603
ESPN.1	4.24561	0.000920842	0.0463713
CUX2.12	4.61292	0.000943864	0.0471915
C10orf54.10	-6.5623	0.000951477	0.0471915
CNTN3.3	6.49664	0.000954591	0.0471915
BMP2K.4	-1.65011	0.000963434	0.0472236
ABHD11.7	1.93103	0.000966888	0.0472236
CA8.8	7.19251	0.00098352	0.0477096
PLEKHF2.8	2.5566	0.000988609	0.0477096
GNG12.1	-1.91527	0.00100908	0.0481466
ITIH5L.x	6.39644	0.00100954	0.0481466
CARD6.5	-4.43371	0.00102157	0.0484353
RAI14.5	-2.9544	0.00102867	0.0484882
BATF3.1	-4.25685	0.00103993	0.0487359
ARHGDIG.16	5.31739	0.00105045	0.0488902
ADCY1.7	8.86725	0.00105528	0.0488902
CRIP1.14	8.58685	0.00107555	0.0494638
AKR1B1.7	-8.62129	0.00107987	0.0494638
C16orf75.16	1.70261	0.00108847	0.0495778
ITGBL1.13	-5.66449	0.0011008	0.0498402
SLITRK4.x	6.7383	0.00110653	0.0498402
KIF12.9	5.12028	0.00112623	0.0502313
PDIA2.16	5.23712	0.00113294	0.0502313
MYO1F.19	3.57066	0.0011338	0.0502313
RAB40C.16	1.71344	0.00116774	0.0514541
IL7R.5	-6.05715	0.00118209	0.0514867
KCNF1.2	6.02155	0.00119651	0.0514867
CPNE8.12	-6.29797	0.00121013	0.0514867
SYT1.12	4.64468	0.00121326	0.0514867
SYCP2L.6	-3.65504	0.00121491	0.0514867
ETV4.17	-3.6503	0.00122167	0.0514867
F7.13	7.63214	0.00123002	0.0514867
ESR1.6	5.59353	0.00123136	0.0514867
GPRC5C.17	2.37821	0.00123247	0.0514867
HIST1H2BF.6	4.05213	0.0012428	0.0514867
EDA2R.x	5.89251	0.00124511	0.0514867
PSCD3.7	-2.29702	0.00124638	0.0514867
MSI1.12	4.54455	0.00125104	0.0514867
RARRES3.11	-4.48612	0.00125776	0.0515018
GFRA1.10	9.17039	0.00128042	0.0519189
ZNF711.x	7.16467	0.00128091	0.0519189
KIFC2.8	2.46658	0.00129632	0.0519189
FAM69A.1	-2.80719	0.00130824	0.0519189
TMEM173.5	-3.17358	0.00131847	0.0519189
SLC6A8.x	2.59545	0.00132057	0.0519189
LOC153328.5	5.34689	0.00132284	0.0519189
SHC3.9	-3.58696	0.00132471	0.0519189
RHOH.4	5.90558	0.00132558	0.0519189
ALDH6A1.14	2.46402	0.00137824	0.0537219
TEC.4	-1.80533	0.0014228	0.0551935
TRPS1.8	4.10914	0.00143152	0.0552673
CD83.6	-2.19693	0.00145019	0.0557226
LOC126075.19	2.81354	0.00147212	0.0562987
MARCH9.12	2.26561	0.00148561	0.0565479
CCDC80.3	-4.37103	0.00151457	0.0568074
RNF150.4	4.66188	0.00152298	0.0568074
BIRC3.11	-4.34101	0.00152557	0.0568074
PCP4.21	6.00024	0.00153663	0.0568074
C6orf211.6	1.91903	0.00153878	0.0568074
TP53INP1.8	2.49426	0.00153938	0.0568074
CASP4.11	-2.52353	0.00154853	0.0568074
CHST1.11	3.76045	0.00155076	0.0568074
SEC14L4.22	-3.82809	0.0015606	0.0568074
CDA.1	-4.77238	0.0015625	0.0568074
CCDC85A.2	5.96916	0.00158417	0.0573383
C10orf10.10	-4.04562	0.00160019	0.0576605
TINAGL1.1	-6.84739	0.00162252	0.0581604
CD22.19	-4.08402	0.00163276	0.0581604
BCAS1.20	6.66003	0.00164751	0.0581604
HLA-DOB.6	-3.77097	0.00164847	0.0581604
RHEBL1.12	-2.07225	0.00164993	0.0581604
DEPDC6.8	4.20282	0.00166419	0.0583395
PSMB8.6	-3.69094	0.0016819	0.0583395
HIST1H2BG.6	5.11521	0.00168209	0.0583395
HIST1H3E.6	4.41582	0.00168379	0.0583395
TMSL8.x	4.75717	0.00169423	0.0584513
NCOA7.6	-2.60077	0.00171123	0.0587877
C14orf83.14	5.07944	0.00172843	0.058996
AK5.1	-5.41429	0.00173184	0.058996
CAST.5	-2.03811	0.00174464	0.0591833
SPRY2.13	-3.30732	0.00176154	0.0593612
SPTLC2.14	2.34072	0.00177511	0.0593612
CBFA2T3.16	8.26202	0.00178623	0.0593612
NALCN.13	-4.77787	0.00178836	0.0593612
HIST1H2AE.6	4.8359	0.00179344	0.0593612
PDCD1LG2.9	-5.25541	0.00179382	0.0593612
SLC9A3R1.17	2.46571	0.00181027	0.059662
LOC201229.17	3.14783	0.00183643	0.0602792
MGC29506.5	4.35494	0.00185238	0.0603634
VLDLR.9	-2.71229	0.00185388	0.0603634
NNMT.11	-6.4578	0.00188306	0.061068
PIK3C2G.12	5.409	0.00191396	0.061695
RGS20.8	-2.49116	0.00191761	0.061695
TNFAIP2.14	-3.86096	0.00194695	0.0617545
FERMT1.20	-2.59811	0.00195017	0.0617545
PNPLA7.9	2.66662	0.00195395	0.0617545
ZNF688.16	1.75875	0.00195795	0.0617545
TMEM132A.11	1.97889	0.00196076	0.0617545
THSD4.15	2.16268	0.00198609	0.0617545
CDRT1.17	-4.47294	0.00199228	0.0617545
ARSG.17	2.55953	0.0019937	0.0617545
C17orf28.17	3.21163	0.00199555	0.0617545
TGFA.2	-2.17308	0.00199696	0.0617545
DTX1.12	3.61147	0.00201189	0.0617545
SEMA3C.7	3.93041	0.00201819	0.0617545
FRAT2.10	1.89546	0.00201848	0.0617545
ADAMTS13.9	2.37068	0.00203008	0.0618761
RIMS4.20	6.85474	0.00204066	0.0619655
FSCN2.17	1.71182	0.00207707	0.0626643
NCAM2.21	9.23051	0.00207913	0.0626643
VASH1.14	2.67107	0.00208841	0.0627108
CCDC48.3	3.70254	0.00214145	0.0640662
HIVEP2.6	-2.06975	0.00215219	0.0641231
PPYR1.10	-3.12898	0.00215917	0.0641231
C4orf34.4	2.66322	0.0021735	0.0642717
HS3ST1.4	-4.4569	0.00218003	0.0642717
MBTD1.17	1.64408	0.00220511	0.064477
KCNK6.19	3.38505	0.00220551	0.064477
HIST1H2BD.6	2.47035	0.00221085	0.064477
PRNP.20	-3.11302	0.00223583	0.0649717
LIFR.5	-2.63696	0.0022501	0.0651298
PHOSPHO1.17	3.22109	0.00225802	0.0651298
LIMS2.2	-5.55372	0.00226538	0.0651298
SH3BGRL.x	2.16608	0.0022734	0.0651298
ST5.11	-2.72667	0.00229848	0.0652983
IGF2BP2.3	-4.37626	0.00230283	0.0652983
LRRC50.16	4.12037	0.00230344	0.0652983
FAM82B.8	1.79441	0.00232627	0.065678
CALD1.7	-5.51474	0.00233304	0.065678
SLC4A10.2	6.49513	0.00235425	0.066046
UGT3A2.5	6.14585	0.00236404	0.0660917
TRIM38.6	-2.26945	0.00238862	0.0665496
SPNS3.17	-2.57678	0.00241099	0.0669427
TAP2.6	-2.48533	0.00242203	0.0670196
RNF139.8	1.99678	0.00243114	0.0670429
SLC19A3.2	-2.38736	0.00245115	0.0673656
C14orf79.14	1.59754	0.00246745	0.0675435
RGS11.16	5.34315	0.00249161	0.0675435
KILLIN.10	2.77664	0.00249497	0.0675435
ACSL5.10	-7.36965	0.00250661	0.0675435
SAA2.11	-6.00951	0.00251068	0.0675435
NDUFB9.8	1.60795	0.00251452	0.0675435
TMEM166.2	-5.7279	0.00251594	0.0675435
HIST1H2BC.6	2.37643	0.00255153	0.0680194
PRLR.5	5.65443	0.00255399	0.0680194
MKS1.17	1.88437	0.00256152	0.0680194
SHC2.19	3.87219	0.00256722	0.0680194
PGLYRP2.19	5.15888	0.00262432	0.0692998
VCL.10	-1.75648	0.00263264	0.0692998
GPC3.x	4.18491	0.00266989	0.0700529
TBC1D1.4	-2.61632	0.00268621	0.0701516
MICALL1.22	-2.02912	0.00269096	0.0701516
KIAA1754.10	-3.81513	0.00271182	0.0702657
ARSI.5	-4.10238	0.00271267	0.0702657
CTTNBP2NL.1	-1.6277	0.00273885	0.0707178
GPR3.1	-3.02026	0.00279282	0.0717214
SPATA7.14	1.63041	0.00279541	0.0717214
CYP4V2.4	-1.81872	0.00285035	0.0729004
C17orf55.17	2.91999	0.00286057	0.0729316
IRF1.5	-2.77887	0.00286966	0.0729321
CPE.4	5.18059	0.00288742	0.0729321
ZFYVE21.14	1.64435	0.00288757	0.0729321
PAN2.12	1.70721	0.00290599	0.0730179
SIDT1.3	4.1551	0.00290898	0.0730179
TUBE1.6	-2.15472	0.00293276	0.0732292
PALM.19	2.05266	0.00293547	0.0732292
GCLM.1	-2.94254	0.0029459	0.0732642
KCNC1.11	3.61398	0.00299747	0.0743186
DNASE1.16	1.50449	0.00302753	0.0748349
CLDN3.7	4.88973	0.00308148	0.0759235
RAPGEFL1.17	3.08523	0.00309029	0.0759235
NXPH3.17	3.5199	0.0031092	0.0761572
ELL2.5	-2.45136	0.0031283	0.0763038
CELSR1.22	1.7262	0.00313401	0.0763038
TLR3.4	-3.33606	0.00318454	0.0770413
CASP10.2	-6.41856	0.00318763	0.0770413
APOL1.22	-5.17921	0.00319281	0.0770413
ASCL2.11	6.05908	0.00325232	0.0782446
PPARG.3	-5.38563	0.00326467	0.0783091
CPT1A.11	2.16391	0.00329664	0.0784068
LMF1.16	2.75994	0.00331308	0.0784068
ITFG3.16	1.66319	0.00331735	0.0784068
LMO3.12	5.42046	0.00332106	0.0784068
CNP.17	-1.51905	0.00335914	0.0784068
PSRC1.1	-1.56582	0.00336303	0.0784068
CTSC.11	-2.22087	0.00336819	0.0784068
SRPK1.6	-1.64963	0.00337216	0.0784068
FAM40B.7	-1.78226	0.00337412	0.0784068
CMIP.16	-1.68741	0.00341524	0.0784068
SERPINB1.6	-2.98841	0.00342372	0.0784068
NLRP1.17	-4.35039	0.00342407	0.0784068
TBC1D2.9	-1.90895	0.00343417	0.0784068
ANGEL1.14	1.93452	0.00343611	0.0784068
ZMAT1.x	5.60901	0.00343861	0.0784068
CD36.7	6.04145	0.00343946	0.0784068
STIM1.11	-2.09697	0.00344296	0.0784068
DTNA.18	7.87899	0.00344309	0.0784068
APOBEC3D.22	-3.5102	0.00346172	0.0784068
PTRF.17	-5.02425	0.00346215	0.0784068
ACOT11.1	-2.5295	0.00348489	0.078702
MGC16169.4	1.59309	0.00359977	0.080863
C17orf51.17	-7.12116	0.003602	0.080863
MDH1B.2	1.86951	0.0036105	0.080863
ENC1.5	-1.99534	0.00366919	0.0819509
APOB48R.16	3.13251	0.00371199	0.0826791
CHST8.19	5.14087	0.00377406	0.0835196
IFT140.16	1.62352	0.00378127	0.0835196
DMC1.22	2.99145	0.00378745	0.0835196
MLPH.2	1.97343	0.00379093	0.0835196
OS9.12	1.83329	0.00382134	0.0838553
C12orf66.12	2.0884	0.00382751	0.0838553
ZNF396.18	3.53532	0.00383719	0.0838553
DENND2D.1	2.83025	0.00387251	0.0843751
GHR.5	7.49714	0.0038818	0.0843751
CD2BP2.16	1.39322	0.00390422	0.0845206
LOXL2.8	-5.9671	0.00390934	0.0845206
IGSF5.21	3.24942	0.00393976	0.0847587
ADSSL1.14	2.9569	0.00394126	0.0847587
ABCA3.16	2.77473	0.00396234	0.0849866
TNFAIP3.6	-2.80146	0.00398633	0.0850827
PFN2.3	1.81883	0.00399529	0.0850827
UQCRB.8	1.3992	0.0039983	0.0850827
CA9.9	-4.66448	0.004021	0.0851103
ELAC1.18	2.28007	0.0040256	0.0851103
PTGER3.1	7.50792	0.00403109	0.0851103
P2RX2.12	4.56106	0.00404444	0.0851703
FN3K.17	1.60099	0.0040744	0.0855789
SELENBP1.1	2.39454	0.00409079	0.0857012
ZNF596.8	1.62106	0.00411971	0.0860455
TRIM22.11	-3.68764	0.00413846	0.0860455
ARHGAP28.18	-5.60565	0.00413907	0.0860455
RARA.17	1.60062	0.00415855	0.0862294
FOSL1.11	-5.79728	0.00417315	0.0862294
C3orf57.3	8.95101	0.00417982	0.0862294
C15orf52.15	-3.59645	0.0042103	0.0866378
IL15RA.10	-2.91625	0.00424601	0.0871514
LUZP1.1	-1.53017	0.00425706	0.0871575
CUEDC1.17	2.16796	0.00432773	0.0881976
LRRCC1.8	2.15462	0.00434864	0.0881976
LARGE.22	7.02231	0.00434968	0.0881976
BMPR1B.4	5.18276	0.00435137	0.0881976
C9orf21.9	-1.7199	0.00437252	0.0884053
C17orf58.17	1.4889	0.00441467	0.0890353
KIAA1407.3	2.17396	0.00442989	0.0891208
LOC26010.2	-2.23889	0.00446979	0.0892935
MAFF.22	-2.98688	0.00448782	0.0892935
JHDM1D.7	2.06619	0.00449272	0.0892935
LINCR.2	-5.91968	0.00449342	0.0892935
HMGA1.6	-2.89867	0.00449355	0.0892935
ACVR1B.12	1.26438	0.00453259	0.0898491
P2RY10.x	5.17389	0.00459859	0.090935
BCL7A.12	1.71762	0.00464898	0.0917078
NAP5.2	5.4455	0.00467028	0.0919044
ACOT2.14	1.79135	0.00469088	0.0920862
VCAN.5	4.60477	0.00475417	0.0931032
DCXR.17	2.08812	0.00478943	0.0935678
FMNL2.2	-2.65228	0.00485591	0.0946385
ENG.9	-3.55846	0.00487491	0.0947597
PALM2-AKAP2.9	-4.00826	0.00488551	0.0947597
RND2.17	4.81087	0.00491751	0.0951528
C1orf89.1	1.64445	0.0049756	0.0960476
CNTNAP3.9	-5.21341	0.00499653	0.0960699
CHDH.3	2.94647	0.00501129	0.0960699
ZNF764.16	1.33755	0.00502201	0.0960699
IYD.6	4.83329	0.00502415	0.0960699
LRRC51.11	1.91733	0.00504465	0.0962348
FKBP1A.20	-1.49873	0.00506383	0.0962627
OLFML2B.1	-2.52718	0.00506985	0.0962627
NRIP2.12	2.09434	0.00510894	0.0966409
SLAMF7.1	-3.63164	0.00511361	0.0966409
GPM6B.x	1.98723	0.0051839	0.0976255
FBXO2.1	3.25199	0.00518979	0.0976255
DSCAM.21	7.52268	0.00526894	0.0986168
ZNF501.3	-5.83436	0.00528963	0.0986168
MPRIP.17	-1.62435	0.00529342	0.0986168
RDH16.12	2.87082	0.00529421	0.0986168
ZNF287.17	1.55353	0.00530331	0.0986168
CPNE3.8	1.41306	0.00532903	0.0987412
MYB.6	3.81179	0.00536925	0.0987412
NPTXR.22	1.51593	0.00537959	0.0987412
ZNF385A.12	2.25719	0.00539	0.0987412
FYN.6	-3.21818	0.0053929	0.0987412
SERINC4.15	1.97279	0.0053939	0.0987412
DOK7.4	4.24716	0.00540237	0.0987412
CACNA1C.12	4.61751	0.00540743	0.0987412
CHST11.12	-2.9381	0.0054229	0.0988012
CCDC90A.6	-1.44325	0.00543829	0.0988594
CIRBP.19	1.92825	0.00545277	0.0989008
MT1X.16	-3.79921	0.00547314	0.0990487
TEAD1.11	-1.775	0.0054872	0.0990821
ZDBF2.2	-2.41678	0.00551938	0.0994416
SERTAD2.2	-1.86177	0.00555145	0.0997977
NAB1.2	-1.695	0.00558858	0.100243
RGL1.1	-2.93678	0.00562408	0.100656
KIAA0802.18	-2.76757	0.00563643	0.100656
TMEM205.19	1.73724	0.00572034	0.100918
KLRG2.7	4.67588	0.00572324	0.100918
DPYD.1	-5.02422	0.00573889	0.100918
TNFRSF10C.8	4.27171	0.00575478	0.100918
BEX5.x	4.65448	0.00575711	0.100918
CXCL2.4	-4.17899	0.00576202	0.100918
EBAG9.8	1.30512	0.00576469	0.100918
SPTBN4.19	2.55369	0.00576615	0.100918
LDHD.16	3.76798	0.00577962	0.100918
COBL.7	5.75026	0.00578542	0.100918
DHFRL1.3	1.49366	0.00579742	0.100918
TSPAN2.1	-5.90528	0.00580971	0.100918
CASKIN1.16	3.87154	0.00581296	0.100918
CTXN1.19	1.97554	0.00584131	0.101045
C1QTNF1.17	-3.20488	0.00584516	0.101045
LRRC8C.1	-3.082	0.00590168	0.101411
SEPT10.2	-2.02496	0.00590335	0.101411
EFR3B.2	3.07846	0.00590384	0.101411
COLQ.3	2.49182	0.0059383	0.101562
C16orf57.16	-1.87789	0.00595044	0.101562
FKBP4.12	1.99679	0.0059542	0.101562
KIAA0196.8	1.31682	0.005993	0.101562
MKL2.16	1.41459	0.0059955	0.101562
KIF21A.12	1.56032	0.0060064	0.101562
SOX9.17	-2.31976	0.00602871	0.101562
PVR.19	-1.68983	0.00603953	0.101562
BEX4.x	5.25784	0.00605504	0.101562
NAMPT.7	-1.65481	0.00605887	0.101562
LMX1B.9	3.12709	0.00607482	0.101562
PRKG1.10	4.82602	0.00607494	0.101562
MCFD2.2	-1.7809	0.0060755	0.101562
ABHD8.19	-2.74659	0.0061149	0.10201
CCDC88A.2	-4.32379	0.00618938	0.103041
PLCB4.20	3.29686	0.00620706	0.103123
NKX3-1.8	-1.84857	0.00622424	0.103197
ADORA2B.17	-5.8512	0.00625586	0.10351
SARS.1	-1.61521	0.00632301	0.104408
GRAMD1B.11	-3.92922	0.00635065	0.104651
TRIM2.4	-3.23369	0.00637038	0.104763
FEZ2.2	-1.42402	0.00641999	0.10512
LIF.22	-5.86559	0.00642278	0.10512
PLEKHF1.19	-2.38314	0.00643096	0.10512
SDC2.8	6.88811	0.00644417	0.105124
PRPH.12	3.99311	0.00647806	0.105464
ITGA7.12	2.12572	0.00653868	0.105971
KLHDC9.1	3.25695	0.00654344	0.105971
GRM4.6	4.7513	0.0065533	0.105971
F2RL1.5	-2.71617	0.00656145	0.105971
NARFL.16	1.24871	0.00658272	0.106103
ADAM17.2	-1.57088	0.00663044	0.10666
DENND2A.7	-4.65241	0.00664451	0.106675
ADPRHL1.13	1.61355	0.00669364	0.107251
IVD.15	1.58764	0.00672837	0.107391
SPATA17.1	3.07314	0.00674446	0.107391
APOL3.22	-4.46577	0.00675411	0.107391
RASGRP1.15	4.13288	0.00675532	0.107391
CLN3.16	1.58483	0.00677936	0.107415
TOB1.17	3.00056	0.00678337	0.107415
SRXN1.20	-1.3674	0.00684972	0.108005
FLJ35776.18	-1.47676	0.00685631	0.108005
PATZ1.22	2.07722	0.00686057	0.108005
LOC124220.16	5.7969	0.00691138	0.108594
SMUG1.12	1.49324	0.00696456	0.109218
DTX3.12	1.58407	0.00698525	0.109331
HDDC3.15	1.37628	0.00700006	0.109352
BCDIN3D.12	1.58714	0.00705047	0.109666
GDAP1.8	2.20956	0.00705776	0.109666
CYP11A1.15	-3.22734	0.00706075	0.109666
CREB3L4.1	3.00465	0.00713857	0.110514
EML4.2	-1.36034	0.00714416	0.110514
CHRM1.11	4.97971	0.00716392	0.110514
FZD7.2	-2.17163	0.00717149	0.110514
NSBP1.x	3.48147	0.00718404	0.110514
C12orf25.12	1.71067	0.00719718	0.110514
MSLN.16	-2.65853	0.00722276	0.110614
FLT4.5	5.45217	0.00723096	0.110614
TCN2.22	-2.37555	0.00731128	0.111459
TOE1.1	-1.1391	0.00731368	0.111459
CECR2.22	3.83622	0.007331	0.111513
SYCP2.20	3.92225	0.00739305	0.112201
ATP2A3.17	4.5503	0.0074053	0.112201
C20orf94.20	1.23529	0.00744106	0.112201
ATP6V1G2.6	1.76859	0.00745917	0.112201
GGT7.20	1.72285	0.00746649	0.112201
ACTA2.10	3.50566	0.00747275	0.112201
GRPR.x	4.5132	0.00748509	0.112201
ITPKB.1	2.16036	0.00749485	0.112201
LAMC2.1	-2.29048	0.00750076	0.112201
MST1.3	1.95309	0.00754187	0.112608
C6orf204.6	-2.40843	0.00757984	0.112967
C7orf50.7	1.11616	0.00760612	0.112971
LAMB3.1	-3.65999	0.00760797	0.112971
EPHB2.1	-3.2701	0.00765171	0.113413
NAV1.1	-4.14832	0.00767753	0.113588
CD274.9	-4.78195	0.00770486	0.113784
AKR1C1.10	-3.658	0.00773574	0.113857
TTC39A.1	3.82899	0.00776954	0.113857
CLN8.8	1.46403	0.00778089	0.113857
RNF152.18	2.7775	0.00778103	0.113857
CLIC1.6	-1.37999	0.00778523	0.113857
RBMS1.2	-1.90299	0.00779403	0.113857
PRUNE2.9	4.87339	0.00785752	0.114578
FGFR3.4	2.25686	0.00787844	0.114661
UBFD1.16	1.19586	0.00789149	0.114661
CIITA.16	-3.15324	0.00794437	0.115223
PINK1.1	-1.53499	0.00796538	0.115321
HPSE.4	-2.4954	0.00798403	0.115385
CHMP2A.19	1.53522	0.00800923	0.115448
LIPE.19	-3.24174	0.00801687	0.115448
CCDC110.4	3.53148	0.00805512	0.115591
XYLT2.17	1.87276	0.00805529	0.115591
TTC8.14	1.54713	0.00811844	0.116085
ZNF259.11	-1.23873	0.00814433	0.116085
ZFP90.16	1.14779	0.00814647	0.116085
DHRS4L2.14	1.44745	0.00814701	0.116085
MTSS1.8	3.58233	0.00819497	0.116455
PLB1.2	-3.28089	0.0082017	0.116455
ITPR3.6	-1.35697	0.00823666	0.116747
CLU.8	2.34973	0.00827449	0.117079
ARF3.12	1.12542	0.00831221	0.117407
TNFRSF21.6	-2.62593	0.00842485	0.118599
SLC44A4.6	5.74108	0.00844378	0.118599
GALNTL1.14	3.08464	0.00846591	0.118599
DDO.6	-3.28319	0.00846624	0.118599
ZNF213.16	1.31901	0.00848083	0.118599
WDR5B.3	1.44855	0.00848638	0.118599
NFE2L2.2	-1.25124	0.00849896	0.118599
CFB.6	-3.76897	0.00858023	0.119446
ERRFI1.1	-2.32284	0.00858912	0.119446
SLC7A8.14	6.3319	0.00867779	0.12034
BTG2.1	3.06223	0.00868312	0.12034
FAM103A1.15	1.62945	0.00872409	0.120668
PTCH1.9	-1.69752	0.00873657	0.120668
KLHL13.x	4.13376	0.00876247	0.12082
SEMA7A.15	-2.81752	0.00882728	0.121507
RRAS2.11	-1.16598	0.0088457	0.121554
LPIN1.2	-1.9564	0.0089289	0.122378
EID3.12	-3.69783	0.00897713	0.122378
PSMA5.1	-1.44642	0.00899707	0.122378
GATA3.10	4.20519	0.00900635	0.122378
ZNF703.8	1.75235	0.00901036	0.122378
CST6.11	-4.80415	0.00904208	0.122378
FBXW4.10	1.13882	0.00904921	0.122378
GFOD1.6	-2.63097	0.00905042	0.122378
LRRC6.8	4.50962	0.00906253	0.122378
B4GALNT2.17	4.60013	0.00909371	0.122378
WWTR1.3	-1.64538	0.00909848	0.122378
HIST1H4H.6	2.28568	0.00911316	0.122378
SLC2A12.6	-2.4506	0.00913256	0.122378
ITGA6.2	-2.40518	0.00914266	0.122378
HSPBAP1.3	-1.22661	0.00915899	0.122378
CAPS.19	2.49987	0.00916456	0.122378
PAX9.14	3.89241	0.00916669	0.122378
RPS20.8	1.22128	0.00917739	0.122378
SULF1.8	8.30263	0.00919242	0.122378
ID2.2	4.08647	0.00923303	0.122554
CNPY2.12	1.09614	0.00923586	0.122554
TAPBP.6	-1.30299	0.00925937	0.122665
RORC.1	4.05435	0.00932388	0.123184
SLC1A3.5	-5.30696	0.00933607	0.123184
C3orf70.3	5.23778	0.00934411	0.123184
TSPAN31.12	2.2048	0.00941637	0.123809
CA12.15	7.61351	0.00943009	0.123809
NEXN.1	-3.69148	0.00943733	0.123809
PIK3IP1.22	1.96278	0.00951333	0.124056
MTL5.11	1.95234	0.00951532	0.124056
MYO5C.15	1.98366	0.00951684	0.124056
GPR143.x	4.56059	0.00951739	0.124056
TRMT12.8	1.73172	0.00957985	0.12467
GPD1L.3	2.23222	0.00961103	0.124875
SLC39A6.18	4.04921	0.00968227	0.125353
DHRS4.14	1.58544	0.00968779	0.125353
CSAD.12	1.99931	0.00969608	0.125353
CCDC11.18	2.39663	0.0097224	0.125353
VARS.6	-1.17339	0.00972514	0.125353
SHOX2.3	-3.19559	0.00975027	0.125478
KCNS1.20	-4.34758	0.00977803	0.125636
PELI1.2	-1.97523	0.00983466	0.12604
EXDL2.14	1.44827	0.00984062	0.12604
BPTF.17	1.43878	0.00986158	0.126086
KIAA1737.14	1.28773	0.00987529	0.126086
METTL1.12	1.12456	0.00989973	0.126199
PRG4.1	4.18055	0.00997945	0.127016
C3.19	-3.75238	0.0100377	0.127557
HDAC11.3	1.027	0.0100758	0.127638
ATP5G2.12	1.41602	0.0100863	0.127638
BIN1.2	-3.51303	0.0100973	0.127638
OLFM1.9	8.08382	0.0101146	0.127638
LBH.2	-5.83429	0.0101304	0.127638
TUBA1A.12	2.62264	0.0101386	0.127638
PRKD3.2	-1.6891	0.0101858	0.127935
RAB6C.2	3.75961	0.0102215	0.127935
CDIPT.16	1.3174	0.0102372	0.127935
MBNL2.13	-2.64189	0.0102425	0.127935
JPH1.8	3.9407	0.0102521	0.127935
PLRG1.4	-1.25126	0.0102568	0.127935
LNX1.4	2.03733	0.0102913	0.128098
NFATC4.14	3.09654	0.0103015	0.128098
CTPS.1	-1.57231	0.0103676	0.128544
ETNK2.1	2.25994	0.010369	0.128544
SFRS17A.x	1.16564	0.0103896	0.128602
FLYWCH2.16	1.25736	0.0104179	0.128729
RND1.12	2.80342	0.0104316	0.128729
SAA1.11	-5.43782	0.010448	0.128735
SEMA6A.5	3.18338	0.0104821	0.128765
TMEM158.3	-3.54783	0.0104822	0.128765
SBK1.16	3.66122	0.0105704	0.129587
CCDC148.2	2.02986	0.010594	0.129587
IFIT3.10	-4.31828	0.010617	0.129587
WISP2.20	6.56085	0.0106457	0.129587
BUB1.2	-1.12579	0.0106579	0.129587
ASB8.12	1.28457	0.0106701	0.129587
FGFBP3.10	1.59465	0.0106874	0.129587
TBX2.17	7.23003	0.0107043	0.129587
STK32B.4	3.91868	0.0107343	0.129587
LONRF2.2	5.95632	0.0107377	0.129587
TTL.2	-1.29102	0.0107706	0.129587
SLC35A1.6	1.81371	0.0107881	0.129587
HJURP.2	-1.34057	0.0108003	0.129587
TLN1.9	-1.64348	0.0108064	0.129587
FLJ45983.10	6.05695	0.0108156	0.129587
TMEM49.17	1.79964	0.0108236	0.129587
GLCCI1.7	2.13411	0.0108275	0.129587
RAD9A.11	1.38484	0.0108421	0.129587
FAHD1.16	1.31613	0.0108528	0.129587
B4GALT5.20	-1.4733	0.0108865	0.129798
ZKSCAN1.7	1.37624	0.0109266	0.130085
ARSD.x	2.52721	0.0109611	0.130133
C16orf71.16	3.64679	0.0109728	0.130133
DNAJC14.12	1.12919	0.0109788	0.130133
FNDC3B.3	-1.66395	0.0110387	0.130653
AKT3.1	-6.01438	0.0110747	0.130704
BAG2.6	-3.21203	0.0110914	0.130704
MYH9.22	-1.43831	0.0110914	0.130704
P2RX5.17	-2.709	0.0111678	0.131413
PPM1K.4	2.8233	0.0111873	0.131452
ST6GALNAC2.17	2.54635	0.0112104	0.131533
PRKAG2.7	-1.44118	0.0112377	0.131534
SSH3.11	1.81466	0.0112444	0.131534
PDCD4.10	3.37243	0.0112592	0.131534
DAP.5	-1.29965	0.0112976	0.131667
ABCC11.16	8.15057	0.0113031	0.131667
SLC16A9.10	4.47823	0.0113647	0.132142
MAGED2.x	1.87814	0.0113836	0.132142
RABEP2.16	1.64665	0.0114151	0.132142
IRX4.5	6.2104	0.0114389	0.132142
ERBB3.12	3.50165	0.0114685	0.132142
RNF182.6	-4.63994	0.0114997	0.132142
ATP1A1.1	-1.54167	0.0115089	0.132142
WBP1.2	1.28905	0.0115121	0.132142
MEIS2.15	-2.41252	0.0115275	0.132142
SAMD11.1	4.09726	0.011528	0.132142
CCDC117.22	1.28954	0.0115349	0.132142
CD97.19	-3.29062	0.0115405	0.132142
RTN4RL1.17	3.55078	0.0115622	0.132142
ZNF397.18	1.72086	0.011572	0.132142
SPRED1.15	-1.57252	0.0115996	0.13227
EME2.16	2.23581	0.0116318	0.132367
SYP.x	2.51711	0.0116407	0.132367
KCNE4.2	5.16807	0.0117512	0.132838
B2M.15	-1.6718	0.0117578	0.132838
CABLES1.18	1.91556	0.0117791	0.132838
STRA13.17	1.46911	0.0117833	0.132838
GPR37L1.1	4.46778	0.0118117	0.132838
LYN.8	-2.66537	0.011813	0.132838
NIBP.8	1.17331	0.0118232	0.132838
C6orf154.6	2.46716	0.0118236	0.132838
MGC24039.12	-1.37721	0.0118296	0.132838
EAPP.14	1.32902	0.0119212	0.133524
CLIP4.2	-6.27311	0.0119424	0.133524
LRP8.1	-1.54729	0.0119533	0.133524
ACAD10.12	1.55642	0.0119637	0.133524
ADCY3.2	-1.86095	0.011973	0.133524
C10orf95.10	1.90831	0.0120053	0.133701
ABAT.16	4.70288	0.0120706	0.134143
GNA14.9	5.24768	0.0120786	0.134143
OSMR.5	-2.6821	0.0120951	0.134143
GAL3ST2.2	2.46646	0.0121112	0.134143
FAM155A.13	5.05902	0.0121391	0.134269
IRAK1.x	-2.05573	0.0121758	0.13449
LRP12.8	-1.65319	0.0121949	0.134519
KIAA0999.11	-1.2789	0.0122158	0.134565
GMPR2.14	1.07293	0.0122599	0.134869
CCDC28A.6	-1.20323	0.0123567	0.135588
ZNF444.19	1.31677	0.0123588	0.135588
C6orf114.6	-1.61984	0.0124433	0.136076
PDE6B.4	3.59815	0.0124434	0.136076
SLC35B1.17	1.16219	0.0124536	0.136076
FAM109B.22	3.81157	0.0124835	0.136219
MAPK8IP2.22	2.65644	0.0125692	0.13697
XDH.2	-4.75211	0.0126046	0.137171
ASXL2.2	-1.00302	0.0126627	0.137446
CNTNAP2.7	6.65892	0.0126783	0.137446
C12orf60.12	1.69422	0.0126807	0.137446
AADACL1.3	-1.80009	0.012699	0.13746
COIL.17	1.14365	0.012771	0.138056
CPLX1.4	3.27586	0.0128778	0.13857
CACNA2D2.3	3.30467	0.0128825	0.13857
MMP16.8	4.60593	0.0129129	0.13857
FBXO44.1	1.06366	0.0129199	0.13857
RAC2.22	-5.84238	0.0129381	0.13857
ZNF680.7	1.56449	0.0129799	0.13857
MALL.2	-4.32328	0.0129815	0.13857
NEB.2	2.98888	0.0130108	0.13857
FBXO6.1	2.26545	0.0130425	0.13857
THBS3.1	1.82984	0.0130433	0.13857
ENTPD2.9	4.53842	0.0130477	0.13857
PRR13.12	1.16295	0.0130613	0.13857
C9orf7.9	1.38146	0.0130771	0.13857
ATP6V1G1.9	1.07328	0.0131068	0.13857
FGD6.12	-1.53051	0.0131126	0.13857
WIBG.12	1.22496	0.013121	0.13857
EVL.14	3.15127	0.0131241	0.13857
TARSL2.15	1.37497	0.0131262	0.13857
GPT.8	1.91317	0.0131943	0.138866
RAD51C.17	1.66752	0.0131974	0.138866
RCSD1.1	-5.62967	0.0132056	0.138866
ZNF785.16	2.68004	0.0132317	0.138959
KIRREL.1	-5.03022	0.0132491	0.138962
KCNC4.1	-3.71763	0.0132806	0.139113
C15orf33.15	1.84352	0.0133313	0.139348
NR3C1.5	-1.84821	0.0133513	0.139348
GADD45A.1	-2.90482	0.0133546	0.139348
PDE9A.21	-2.45926	0.0133758	0.13939
LRRC8D.1	-1.59448	0.0134143	0.139556
EFNA5.5	-1.58503	0.0134467	0.139556
BLOC1S2.10	1.52302	0.0134602	0.139556
CYFIP2.5	5.7842	0.0134868	0.139556
COL4A4.2	-2.5262	0.0134923	0.139556
CYR61.1	-3.30583	0.0134951	0.139556
ABTB2.11	-1.44001	0.0135265	0.139685
MET.7	-3.46381	0.013542	0.139685
BICD2.9	-1.36075	0.0135924	0.140027
SOCS5.2	-1.38065	0.0136399	0.140338
ACSM3.16	1.78353	0.0137664	0.141418
RASL10B.17	5.38304	0.0137863	0.141418
EPAS1.2	-2.36122	0.0137971	0.141418
GPRASP1.x	1.69099	0.0139029	0.142115
TIAM2.6	-2.01357	0.0139076	0.142115
CLDN4.7	1.18121	0.0139332	0.142115
KIAA1467.12	2.49628	0.0139527	0.142115
MACROD2.20	4.50657	0.0139614	0.142115
RSPH1.21	3.047	0.0139704	0.142115
NDUFB10.16	1.05142	0.0140306	0.142385
SURF1.9	1.11721	0.0140321	0.142385
C16orf53.16	1.20853	0.0140576	0.142466
NEK11.3	1.37204	0.0141056	0.142774
IFIT2.10	-3.02014	0.0141236	0.142779
PARP4.13	-1.59798	0.0141518	0.142885
MTRR.5	-1.06629	0.0141788	0.142905
MRPL27.17	1.43247	0.0142079	0.142905
RSAD1.17	1.82095	0.0142147	0.142905
ARL4C.2	-2.94288	0.0142243	0.142905
MKRN3.15	-4.7831	0.0142425	0.142911
ANKLE1.19	-1.57471	0.0142709	0.14298
SEC16B.1	-1.69664	0.0142921	0.14298
SLC25A6.x	1.56448	0.0143366	0.14298
PTPRH.19	-2.74025	0.0143731	0.14298
MTMR2.11	-1.52894	0.0143766	0.14298
LAPTM4B.8	1.65879	0.0143895	0.14298
SPDEF.6	5.28244	0.0143998	0.14298
SLC1A2.11	4.74052	0.0144153	0.14298
FRS2.12	1.43105	0.0144218	0.14298
MICAL2.11	-2.72968	0.0144257	0.14298
LEO1.15	1.10944	0.0144682	0.143119
HIC1.17	-3.9617	0.0144768	0.143119
SHROOM2.x	2.19217	0.0144927	0.143119
CAMK2B.7	4.36396	0.0145412	0.143423
POLI.18	2.18996	0.0145994	0.143503
NME4.16	1.68102	0.0146123	0.143503
HSPG2.1	-1.60811	0.0146227	0.143503
DNAJC30.7	1.44173	0.0146393	0.143503
HGD.3	5.5494	0.0146411	0.143503
PLXNA2.1	-2.11464	0.0146555	0.143503
CENPA.2	-1.22164	0.0146913	0.143539
SERPINB7.18	-5.40337	0.0146946	0.143539
PPARA.22	-2.27669	0.0147152	0.143567
RIN3.14	-3.87505	0.0147546	0.143689
PIM1.6	-2.61179	0.0147916	0.143689
RMND1.6	1.24839	0.0148012	0.143689
NPAS2.2	-3.40683	0.0148162	0.143689
GNAI3.1	-1.22973	0.0148218	0.143689
DOCK9.13	-1.79327	0.0148544	0.143689
ANXA2.15	-1.64265	0.0148612	0.143689
GPN1.2	-0.953551	0.0148754	0.143689
PGM1.1	-2.44211	0.0148896	0.143689
COL4A2.13	-6.15408	0.0149049	0.143689
KIAA0556.16	1.03683	0.0149296	0.143756
SORT1.1	-1.69157	0.0150457	0.143964
TOX2.20	-5.38258	0.0150678	0.143964
CDC20.1	-1.37772	0.0150689	0.143964
GALNT4.12	1.41084	0.0150745	0.143964
PRKCA.17	-2.24344	0.0151079	0.143964
PRICKLE1.12	-4.34776	0.0151115	0.143964
CCT4.2	-0.99685	0.0151344	0.143964
DSCAML1.11	4.42163	0.0151423	0.143964
C3orf26.3	-1.0885	0.0151462	0.143964
SIAH2.3	1.79969	0.0151505	0.143964
LDB1.10	1.59275	0.0151623	0.143964
TMBIM4.12	1.28753	0.0151643	0.143964
SPSB4.3	3.21309	0.0151947	0.144007
ALPP.2	-5.77503	0.0152288	0.144007
EDARADD.1	2.60461	0.0152436	0.144007
FANCF.11	1.41946	0.0152857	0.144007
ARNTL2.12	-2.37404	0.0152969	0.144007
PPP1R14C.6	-3.86895	0.0153083	0.144007
TRIP10.19	-2.17702	0.0153163	0.144007
PKIB.6	3.67048	0.0153167	0.144007
CCDC125.5	1.85871	0.0153566	0.144007
DPY19L4.8	1.06925	0.0153712	0.144007
FBXO15.18	3.15042	0.0153782	0.144007
EIF4B.12	1.33394	0.015386	0.144007
PTPN14.1	-2.20654	0.0153997	0.144007
ENTPD8.9	2.53275	0.0154781	0.144433
RAB21.12	1.2647	0.0155175	0.144433
SLC23A2.20	-1.07515	0.015538	0.144433
CD58.1	-1.69366	0.0155569	0.144433
NSUN5B.7	1.19125	0.0155621	0.144433
RP11-529I10-4.10	1.67162	0.0155653	0.144433
SEL1L.14	1.53781	0.0156007	0.144433
HIST1H3D.6	3.35472	0.0156063	0.144433
VMAC.19	1.27388	0.0156195	0.144433
EHBP1.2	-0.96829	0.0156524	0.144433
PAPPA.9	-3.41074	0.0156674	0.144433
FRMD6.14	-2.23822	0.0156752	0.144433
GPR98.5	2.91838	0.0156769	0.144433
B3GALTL.13	-1.1554	0.0157483	0.144926
HTR1D.1	-3.18909	0.0157696	0.144959
S100A3.1	-4.70156	0.0158185	0.145243
JAG1.20	-3.55559	0.0158844	0.145304
PITPNC1.17	1.56894	0.0158882	0.145304
C14orf2.14	1.09982	0.0159608	0.145304
STAMBPL1.10	-3.7771	0.0159625	0.145304
DMBT1.10	-5.64144	0.0159809	0.145304
CGI-96.22	-1.21838	0.015988	0.145304
DDX23.12	1.10288	0.0160088	0.145304
USP30.12	1.24333	0.0160092	0.145304
MANBA.4	1.80417	0.0160212	0.145304
COL13A1.10	-5.36352	0.0160233	0.145304
FAM100B.17	-1.13135	0.0160293	0.145304
PCDHB5.5	5.43364	0.0160512	0.145304
MYH15.3	-3.5056	0.0160682	0.145304
PPARD.6	-1.06297	0.0160886	0.145304
PCP4L1.1	4.6743	0.0161074	0.145304
CDKN1C.11	-2.63653	0.0161118	0.145304
PGBD1.6	-1.48782	0.016144	0.145432
LOC170082.x	1.90458	0.0161948	0.145519
PTCHD2.1	3.13541	0.0162246	0.145519
ACOT6.14	3.96133	0.0162363	0.145519
AKT1.14	1.09763	0.0162532	0.145519
ITM2C.2	-1.58315	0.0162588	0.145519
SLC7A11.4	-2.43192	0.0162676	0.145519
IL17RB.3	1.7158	0.0162801	0.145519
IL6.7	-3.98022	0.0163056	0.145519
ITPK1.14	1.71742	0.0163214	0.145519
EGFLAM.5	-4.72523	0.0163601	0.145519
U1SNRNPBP.12	1.0507	0.0163911	0.145519
GRINA.8	1.60526	0.016404	0.145519
KCNMA1.10	4.19553	0.0164117	0.145519
TRIM16.17	-2.40666	0.016429	0.145519
WDR77.1	-1.29699	0.0164363	0.145519
ZNF367.9	-1.08116	0.0164409	0.145519
MARCH4.2	-4.80876	0.0165065	0.14594
CTPS2.x	1.53731	0.0165546	0.146074
TTC6.14	3.77617	0.0165654	0.146074
GPR172B.17	3.25278	0.0165834	0.146074
SIRT4.12	1.55162	0.016598	0.146074
STARD8.x	-3.5437	0.0166301	0.146074
APPBP2.17	2.57662	0.0166357	0.146074
ATPIF1.1	1.21204	0.0166477	0.146074
FAM116B.22	1.02289	0.0167023	0.146275
FN1.2	-2.30218	0.0167066	0.146275
RUSC1.1	1.57017	0.0167598	0.146486
CSTA.3	4.27624	0.0167828	0.146486
UBE2E3.2	-1.51438	0.016785	0.146486
ULK3.15	1.23745	0.0168311	0.146522
THNSL1.10	1.9382	0.0168672	0.146522
HIG2.7	1.84927	0.0168743	0.146522
CXXC5.5	1.64724	0.0168906	0.146522
CEACAM19.19	-2.25119	0.0168949	0.146522
SFMBT2.10	5.39615	0.0168975	0.146522
TSFM.12	1.28344	0.0170326	0.147361
CPA4.7	-5.53575	0.0170339	0.147361
GDAP2.1	-1.44507	0.0170488	0.147361
SLC24A3.20	5.964	0.0170963	0.147476
DHX40.17	1.58636	0.0170985	0.147476
LRRC26.9	2.48516	0.0171212	0.147486
ATG2B.14	1.09665	0.0171368	0.147486
EFNA3.1	2.75255	0.0171889	0.147486
SPRY4.5	-4.08283	0.0171964	0.147486
MGAT4B.5	-1.04544	0.0172135	0.147486
LOC441108.5	-2.32603	0.0172198	0.147486
SF3B14.2	-1.09535	0.0172348	0.147486
RPL7L1.6	-1.16291	0.0172453	0.147486
TXNRD1.12	-2.1526	0.0172815	0.147597
COL4A1.13	-4.96651	0.017297	0.147597
EPHA2.1	-3.27803	0.0173326	0.147597
ANKRD34B.5	4.63168	0.0173549	0.147597
XAF1.17	-4.24292	0.0173881	0.147597
BYSL.6	-1.00246	0.0173889	0.147597
CCND3.6	-1.44512	0.0173904	0.147597
NTN4.12	-3.36777	0.0174039	0.147597
C5orf23.5	3.66135	0.0174642	0.147766
PRRT3.3	2.93493	0.0174643	0.147766
MYO1E.15	-1.54488	0.0174842	0.147766
NEK5.13	2.02262	0.0174967	0.147766
TMEM16E.11	5.9561	0.0175295	0.147889
FBP1.9	4.81901	0.0177145	0.149156
NAIP.5	2.96917	0.0177195	0.149156
IGFBP2.2	3.70181	0.0177349	0.149156
UXS1.2	-1.29575	0.0177665	0.149268
ATP8A1.4	5.44163	0.0177946	0.149348
KIAA0182.16	1.89799	0.0178486	0.149647
GPR160.3	2.53245	0.0179524	0.150331
TALDO1.11	-1.45945	0.0179673	0.150331
CGNL1.15	2.27762	0.0180647	0.15099
MAP1B.5	-3.22478	0.0181663	0.151681
TNFAIP8.5	-1.27657	0.0181847	0.151681
HOXC9.12	2.34287	0.0182654	0.151695
C17orf71.17	2.60746	0.0182739	0.151695
RBM4.11	0.949958	0.0182747	0.151695
TMEM45A.3	-4.47798	0.0182846	0.151695
ASPSCR1.17	1.17088	0.0182932	0.151695
CTSS.1	-4.81623	0.0183613	0.151695
BRF1.14	1.58744	0.0183797	0.151695
SOAT1.1	-1.50565	0.0183939	0.151695
GART.21	-1.28239	0.0183939	0.151695
ZNF553.16	1.32482	0.0184018	0.151695
C9orf40.9	-1.61508	0.01841	0.151695
BCAN.1	-3.7688	0.0184109	0.151695
CROT.7	1.42058	0.0184855	0.151979
LDHA.11	-1.4134	0.0185098	0.151979
SGK3.8	1.49964	0.0185155	0.151979
ZNF233.19	2.875	0.0185203	0.151979
NT5E.6	-6.54936	0.018574	0.152045
TBC1D22B.6	-0.944973	0.0185791	0.152045
NFKBIZ.3	-2.18448	0.0185847	0.152045
STK17B.2	-1.36879	0.0186374	0.152322
RHPN1.8	1.8243	0.0186797	0.152514
EIF5A2.3	-2.26355	0.018754	0.152967
RHOD.11	1.80121	0.0188513	0.153606
MPV17L.16	4.89065	0.0188874	0.153746
CDYL.6	-1.0471	0.0189951	0.154467
COQ5.12	1.44349	0.0190277	0.154578
SPTBN2.11	1.36724	0.0190578	0.154667
CCNYL1.2	-2.09508	0.0190972	0.154832
NPDC1.9	1.5848	0.0191603	0.155188
CARD10.22	-1.42564	0.0192077	0.155417
SH3KBP1.x	-2.91931	0.0193208	0.156107
SUPT4H1.17	1.2847	0.0193497	0.156107
PARP3.3	-1.83262	0.0193508	0.156107
PHF1.6	-1.12941	0.0194158	0.156476
SIDT2.11	1.42767	0.0194871	0.156785
HLF.17	3.26997	0.0195112	0.156785
HIRIP3.16	1.63689	0.0195313	0.156785
GBP3.1	-4.65984	0.0195315	0.156785
ZZZ3.1	-1.12668	0.0195819	0.156895
ONECUT2.18	2.13591	0.0195839	0.156895
C9orf30.9	-1.72944	0.019625	0.156977
PARVA.11	-1.63856	0.0196365	0.156977
MAP1S.19	-0.950211	0.0196522	0.156977
RND3.2	-1.80081	0.019751	0.1576
NCAPH.2	-1.00444	0.0197715	0.1576
AMZ2.17	1.02939	0.0197886	0.1576
CLTC.17	1.45846	0.0198343	0.157756
PICALM.11	-1.07388	0.0198552	0.157756
MRFAP1L1.4	0.884486	0.0198665	0.157756
ABCG1.21	3.68497	0.019929	0.158098
FAM110B.8	5.12133	0.0200092	0.158579
SPEG.2	-2.17986	0.0200387	0.158658
MAP2K3.17	-1.30957	0.020063	0.158695
HKDC1.10	-4.66953	0.0201247	0.159001
CD59.11	-1.56645	0.020141	0.159001
NPEPL1.20	1.95752	0.0202093	0.159385
CCS.11	0.963597	0.0203023	0.159963
ZNF839.14	1.00324	0.020341	0.160112
OSBPL7.17	1.5724	0.020378	0.160248
CRY2.11	1.19574	0.020438	0.160489
MYST1.16	1.00561	0.0204482	0.160489
MON2.12	1.17742	0.0205159	0.160864
MFSD3.8	1.45022	0.0205397	0.160895
CCDC151.19	2.21236	0.0205991	0.161133
CCNA1.13	-4.20977	0.0206891	0.161133
SLC26A11.17	1.26188	0.0206997	0.161133
LIMCH1.4	-3.16881	0.0207112	0.161133
LMCD1.3	1.97731	0.0207127	0.161133
LRRC45.17	1.17511	0.0207172	0.161133
MYH10.17	-1.35443	0.0207228	0.161133
ADFP.9	-1.794	0.0207587	0.161133
ATP8B2.1	3.31807	0.0207873	0.161133
CYB561.17	1.48809	0.0208043	0.161133
EXOD1.16	1.58573	0.0208064	0.161133
APOD.3	7.81177	0.0208177	0.161133
HCN2.19	3.07844	0.0208284	0.161133
POLM.7	0.935787	0.0208574	0.161204
RAB13.1	1.45374	0.0209056	0.161422
MARK3.14	0.942657	0.0209304	0.16146
ST6GALNAC5.1	-4.86474	0.0210173	0.161976
WDR22.14	1.02381	0.0211358	0.162438
C14orf143.14	1.39341	0.0211498	0.162438
ZRANB3.2	1.31949	0.0211548	0.162438
CBL.11	-1.26902	0.0211573	0.162438
KRT34.17	-4.92128	0.0211785	0.162446
FLJ13137.1	1.7916	0.0212093	0.162523
KIAA1949.6	-1.75741	0.021236	0.162523
SMARCC2.12	0.92122	0.0212486	0.162523
KLHDC7A.1	4.49955	0.0212911	0.162632
GPX1.3	-5.91802	0.0213411	0.162632
FLJ22662.12	-2.34823	0.0213563	0.162632
ZNF385C.17	1.85788	0.0213713	0.162632
RAB5B.12	0.938646	0.0213762	0.162632
ASAH3L.9	1.31698	0.0213832	0.162632
MOBKL2C.1	-1.36721	0.0214594	0.163058
ZNF517.8	1.34655	0.0215312	0.163451
STIL.1	-1.11022	0.0215651	0.163555
NSMCE2.8	1.36818	0.0215956	0.163633
MRPS23.17	1.11623	0.0216159	0.163634
C19orf21.19	4.66121	0.02164	0.163664
ATAD4.17	4.85682	0.0216627	0.163683
EBNA1BP2.1	-1.22913	0.0217124	0.163898
RAD54L.1	-1.06448	0.0217347	0.163898
GNMT.6	2.58532	0.0217519	0.163898
HCP5.6	-3.94546	0.0218335	0.163981
NPR3.5	3.21849	0.0218369	0.163981
C14orf179.14	1.28433	0.0218412	0.163981
LYSMD1.1	1.66219	0.0218907	0.163981
INPP1.2	-3.84133	0.0219084	0.163981
RAB11FIP5.2	-1.6331	0.0219244	0.163981
ETS2.21	-2.89287	0.0219424	0.163981
GPR179.17	3.79998	0.0219707	0.163981
ORC1L.1	-1.14839	0.0219824	0.163981
TMEM200B.1	-4.92946	0.0219831	0.163981
PSMD13.11	-1.26529	0.0219853	0.163981
PBX4.19	-1.8888	0.0220455	0.164079
CCDC149.4	1.31719	0.0220731	0.164079
PGM2.4	-1.37281	0.0221257	0.164079
BTN2A1.6	-1.09774	0.02215	0.164079
PIGZ.3	1.54377	0.022152	0.164079
ADAM10.15	-1.05427	0.0221689	0.164079
OPRL1.20	1.76922	0.0221804	0.164079
FAM120C.x	1.30222	0.0221897	0.164079
SALL2.14	4.9739	0.0222499	0.164079
TOM1L1.17	1.90178	0.0222513	0.164079
ANKRD43.5	4.97788	0.0222698	0.164079
SYDE1.19	-2.51071	0.0222699	0.164079
ZNF107.7	1.56806	0.0222775	0.164079
AFF3.2	6.12244	0.0222898	0.164079
KATNAL2.18	3.55281	0.022302	0.164079
TM6SF1.15	3.61312	0.0223655	0.164397
BLNK.10	4.68509	0.0224182	0.164522
C14orf124.14	1.32736	0.0224614	0.164522
MAP3K14.17	-2.66018	0.0224666	0.164522
BTN3A3.6	-2.33974	0.022467	0.164522
LMO2.11	-1.95011	0.022484	0.164522
TOR2A.9	1.57243	0.0225325	0.164728
STOM.9	2.25829	0.0225785	0.164916
PLEKHH1.14	2.57993	0.0226821	0.164956
NWD1.19	-3.40055	0.0226864	0.164956
PHLDA2.11	-2.38322	0.0227053	0.164956
FBXO21.12	1.00188	0.022731	0.164956
NOSTRIN.2	1.86068	0.0227403	0.164956
GRIN2C.17	2.06772	0.0227429	0.164956
SGTB.5	-1.77917	0.0227449	0.164956
DECR1.8	1.5202	0.0227863	0.164956
TNRC6C.17	1.5755	0.0227873	0.164956
TRIOBP.22	-0.966634	0.0227947	0.164956
DCBLD1.6	-1.85234	0.0228095	0.164956
RRN3.16	1.0536	0.0228282	0.164956
GDPD3.16	2.01972	0.0228656	0.16508
EXT1.8	-1.86205	0.0229095	0.1652
PHLDA1.12	-2.64867	0.0229313	0.1652
KIAA0513.16	1.80201	0.0229616	0.1652
MUC5B.11	4.23735	0.0229638	0.1652
PSTPIP2.18	2.76139	0.0230032	0.165206
SRMS.20	3.71434	0.0230053	0.165206
MYEF2.15	2.59873	0.0230543	0.165361
MRFAP1.4	0.884626	0.0230714	0.165361
MACF1.1	-2.03128	0.0230882	0.165361
ALKBH1.14	1.13416	0.023148	0.165464
SYCE2.19	1.5109	0.0231493	0.165464
ITGAV.2	-1.4618	0.0231734	0.165464
ZSCAN2.15	1.29664	0.0232036	0.165464
C14orf28.14	1.34614	0.0232237	0.165464
KIAA0329.14	1.19022	0.0232462	0.165464
CBX1.17	0.985698	0.0232639	0.165464
EPHA6.3	3.85825	0.0232814	0.165464
STARD5.15	1.63035	0.0232862	0.165464
MCCC2.5	1.17019	0.0233758	0.165955
NPNT.4	5.90583	0.0234862	0.166189
LRSAM1.9	1.2045	0.023487	0.166189
SERF2.15	1.19641	0.0234885	0.166189
NBEA.13	1.43916	0.0234907	0.166189
SOX12.20	1.35012	0.0235558	0.166363
ALDH1B1.9	-1.18969	0.0235763	0.166363
FMO5.1	1.68647	0.0235769	0.166363
TMEM63C.14	5.35126	0.0236157	0.166371
PSAT1.9	-3.31551	0.0236905	0.166371
C17orf91.17	-1.35492	0.0236969	0.166371
WDR3.1	-1.00771	0.0237019	0.166371
FBRS.16	1.09208	0.0237164	0.166371
UST.6	1.65091	0.023724	0.166371
HEXDC.17	1.36302	0.0237336	0.166371
JAM2.21	4.0078	0.0237422	0.166371
SMARCD2.17	1.42175	0.0237675	0.166405
PIB5PA.22	3.00243	0.023796	0.16646
PDGFC.4	-2.98517	0.0238603	0.166645
TRAM1L1.4	4.57484	0.0238784	0.166645
STRBP.9	1.13724	0.0239005	0.166645
QSER1.11	-1.69513	0.0239126	0.166645
PCDHA5.5	3.95515	0.0239251	0.166645
LLGL2.17	2.34476	0.0239678	0.166743
GARNL1.14	1.29413	0.0239803	0.166743
EDEM1.3	-1.14399	0.024012	0.16682
SEC14L2.22	-1.77968	0.0240604	0.166928
TP53I11.11	2.32599	0.02408	0.166928
ARHGAP21.10	-1.19756	0.0240893	0.166928
BDH1.3	1.76405	0.0241703	0.167058
FLJ40142.12	1.16209	0.0241779	0.167058
NDUFA4.7	1.26763	0.0241998	0.167058
SHANK2.11	2.52482	0.0242068	0.167058
ACAT2.6	-1.247	0.0242111	0.167058
KIFC3.16	-2.75932	0.0242608	0.167258
RAB1B.11	1.06437	0.0243541	0.167524
MYST2.17	1.51131	0.0243725	0.167524
MYEOV.11	-5.20335	0.0243964	0.167524
ITGAE.17	-1.10427	0.0244	0.167524
HRH1.3	-4.05324	0.0244176	0.167524
POMT1.9	1.54478	0.0244233	0.167524
RBM43.2	1.06541	0.0245279	0.167773
TRIO.5	-1.4279	0.0245384	0.167773
C14orf80.14	1.39676	0.0245484	0.167773
CMBL.5	4.61812	0.0245529	0.167773
ADAMTSL4.1	-1.87696	0.024572	0.167773
HLA-A.6	-4.42163	0.0245855	0.167773
C14orf149.14	-1.20779	0.0246045	0.167773
PDK1.2	-1.45133	0.0246432	0.167896
HSF4.16	1.30326	0.0247202	0.168279
ROBO4.11	-4.96263	0.0247593	0.168404
MRPS28.8	0.960373	0.0248563	0.168742
IDH2.15	1.86723	0.0248596	0.168742
HPS5.11	-1.26327	0.0248793	0.168742
WDR89.14	0.971851	0.0248922	0.168742
SERPINF1.17	1.36286	0.0249665	0.169046
SLC27A1.19	-1.14914	0.0250141	0.169046
RUNX2.6	-2.61897	0.0250286	0.169046
APOBEC3B.22	-1.60102	0.0250376	0.169046
XPO5.6	-0.895334	0.0250503	0.169046
TRIM3.11	1.90029	0.0250622	0.169046
PCDHA12.5	4.18274	0.0251244	0.169123
ANTXR1.2	-2.73039	0.025126	0.169123
TMEM186.16	0.967726	0.0251641	0.169123
HEXIM2.17	1.19304	0.0251854	0.169123
RTP4.3	-3.60708	0.0251977	0.169123
GPR17.2	-3.36145	0.0252183	0.169123
PALM2.9	-2.44529	0.0252524	0.169123
SLC12A7.5	3.98668	0.0252538	0.169123
CCDC78.16	1.88732	0.0253204	0.169123
EPB41L2.6	-2.29666	0.0253268	0.169123
ZAK.2	-1.70162	0.0253349	0.169123
E2F5.8	1.64475	0.0253428	0.169123
MUCL1.12	6.82645	0.0254042	0.169123
FOXA1.14	5.98742	0.025433	0.169123
RAB26.16	2.23101	0.0254516	0.169123
CUZD1.10	-1.85248	0.0254923	0.169123
RAC3.17	1.95671	0.0255506	0.169123
ZNF273.7	1.24411	0.0255533	0.169123
MARVELD2.5	1.58868	0.0255561	0.169123
PPM2C.8	-1.73171	0.025567	0.169123
SHROOM1.5	-1.43159	0.0255829	0.169123
MFNG.22	-1.64802	0.025585	0.169123
ZNF250.8	1.17402	0.0256032	0.169123
LONRF3.x	-4.45294	0.0256263	0.169123
MDP-1.14	1.18849	0.0256349	0.169123
CELSR3.3	2.05315	0.0256356	0.169123
HYPK.15	1.37846	0.0256486	0.169123
SOD2.6	-1.00707	0.0256717	0.169123
LOC100137047.15	1.10672	0.0256786	0.169123
FBXL11.11	1.04325	0.0257295	0.169302
ACOT4.14	2.38085	0.0257475	0.169302
PGCP.8	4.84816	0.0257772	0.16936
C16orf33.16	1.40298	0.0257982	0.169361
SETMAR.3	1.32107	0.0258889	0.169712
H2AFY2.10	3.50117	0.0258936	0.169712
KLHL12.1	1.09168	0.0259164	0.169714
ATF3.1	-1.18645	0.0259779	0.169714
ALOX5.10	-4.39964	0.0260003	0.169714
GNE.9	-2.49387	0.0260042	0.169714
LAMA2.6	-2.87723	0.0260048	0.169714
RIBC1.x	1.80546	0.0260379	0.169714
NUP210L.1	4.62139	0.0260596	0.169714
MLXIPL.7	3.44453	0.0260793	0.169714
CSF2RA.x	-4.44878	0.0260879	0.169714
FUZ.19	3.56896	0.0261153	0.169714
SCLY.2	-1.32739	0.0261531	0.169714
MFI2.3	-2.89495	0.0261719	0.169714
ZNF174.16	0.873944	0.0262056	0.169714
RBM7.11	-1.35839	0.0262527	0.169714
ICAM4.19	-2.91113	0.0262573	0.169714
FKBP3.14	1.14813	0.0262687	0.169714
C16orf3.16	1.75015	0.026274	0.169714
RAB30.11	1.11318	0.0262883	0.169714
DCBLD2.3	-1.13757	0.0262916	0.169714
BXDC1.6	-1.37478	0.0263714	0.170094
DCST2.1	1.30838	0.0264161	0.170114
CASD1.7	1.37049	0.0264166	0.170114
HEATR4.14	2.40614	0.0264838	0.170412
C17orf90.17	1.00952	0.0266328	0.171163
TATDN1.8	1.61955	0.0266427	0.171163
STEAP3.2	-1.48555	0.0267441	0.171556
LY6K.8	-2.89479	0.0267555	0.171556
IFNAR2.21	-1.37825	0.0267773	0.171556
PBLD.10	1.89352	0.0268091	0.171556
RASGRF1.15	-3.73113	0.0268183	0.171556
CHCHD7.8	0.966536	0.0268309	0.171556
ADCY7.16	-2.75541	0.026881	0.171649
GPSM2.1	-1.30848	0.0268878	0.171649
SCRN1.7	1.05357	0.0269529	0.17193
OPHN1.x	-1.14274	0.0270228	0.17224
HELZ.17	1.06517	0.0270871	0.172268
C1GALT1.7	-1.3004	0.0270898	0.172268
CLCC1.1	-1.33372	0.0271189	0.172268
PLCH1.3	4.97372	0.0271302	0.172268
TMEM53.1	-1.26061	0.0271335	0.172268
TBX3.12	6.12117	0.0272163	0.172561
THTPA.14	1.42052	0.0272571	0.172561
PPIL2.22	0.879458	0.0272608	0.172561
SUV420H2.19	1.14401	0.0272647	0.172561
MAGIX.x	1.43241	0.0274156	0.173198
GJB2.13	-2.57715	0.0274248	0.173198
MAML3.4	1.78182	0.0274294	0.173198
ICA1.7	2.31819	0.0275777	0.173974
SYTL1.1	1.68606	0.0275953	0.173974
GABBR2.9	-3.94277	0.0276681	0.174297
INPP5D.2	3.6979	0.0277629	0.174669
GALNT14.2	-2.62915	0.0277702	0.174669
CLSTN2.3	5.3052	0.0277952	0.174691
LOC92270.5	2.20122	0.0278492	0.174895
WDR12.2	-0.842312	0.0279625	0.17547
ELK3.12	-2.65283	0.0280095	0.175629
RANGRF.17	-2.14413	0.0280806	0.175853
EREG.4	-2.4572	0.028108	0.175853
YOD1.1	-2.74985	0.0281102	0.175853
C17orf60.17	-3.58191	0.0281332	0.175861
PTGR2.14	1.69562	0.0281688	0.17594
HOXB4.17	-3.8856	0.0281958	0.17594
ZNF84.12	1.1004	0.028211	0.17594
HIST2H2BE.1	2.9244	0.0283034	0.176331
SLC45A3.1	-2.71767	0.0283172	0.176331
CORO6.17	-2.21028	0.0283609	0.176416
FAM63B.15	-1.21142	0.0283743	0.176416
SNX29.16	1.44437	0.0284482	0.176619
MED13L.12	1.47213	0.0285798	0.176619
PDLIM1.10	-0.970667	0.0285845	0.176619
FLJ16165.19	-3.27221	0.0286126	0.176619
SCNN1B.16	4.74863	0.0286151	0.176619
EMID1.22	2.59879	0.0286168	0.176619
TRPV4.12	3.461	0.0286217	0.176619
PBX1.1	2.84868	0.0286314	0.176619
MFGE8.15	-2.24639	0.0286349	0.176619
MVP.16	-1.64587	0.0286606	0.176619
ACADSB.10	1.48321	0.0286621	0.176619
C1orf168.1	3.6915	0.0286683	0.176619
TMEFF1.9	-1.27093	0.0287079	0.176728
HMGN4.6	-1.23621	0.0288351	0.177088
C15orf37.15	1.23993	0.0288724	0.177088
SH3D19.4	-1.64532	0.0288744	0.177088
KLHL25.15	1.04805	0.0288955	0.177088
POLD4.11	1.53848	0.0289143	0.177088
TMED10.14	0.958514	0.0289144	0.177088
ATXN7L1.7	1.40572	0.0289192	0.177088
PCCB.3	1.10715	0.0289659	0.177152
NFE2L3.7	-2.79987	0.0290406	0.177152
LPCAT2.16	-3.14044	0.0290459	0.177152
BNIPL.1	4.10783	0.029067	0.177152
COL1A1.17	1.82083	0.0290759	0.177152
TSPAN12.7	4.30568	0.0290803	0.177152
SPATA2L.16	1.21213	0.0290826	0.177152
ACTN1.14	-1.40724	0.029108	0.177173
ADCK1.14	1.73686	0.029157	0.177339
SLC2A8.9	1.24393	0.02922	0.177588
IFRD2.3	-1.04982	0.0293127	0.177889
DONSON.21	-1.74322	0.0293265	0.177889
KIAA1688.8	0.983381	0.0293352	0.177889
ZMYND11.10	0.938438	0.0293944	0.177942
TANC1.2	-1.10629	0.0294011	0.177942
C9orf152.9	5.28378	0.0294099	0.177942
FAM33A.17	1.36228	0.029432	0.177943
CABYR.18	1.77732	0.0294608	0.177984
SNAI1.20	-1.71922	0.0294844	0.177995
ZSWIM4.19	-1.40631	0.0295157	0.178051
NDUFB11.x	0.990265	0.0295874	0.178148
COX6A1.12	0.937389	0.029613	0.178148
SHCBP1.16	-1.40283	0.0296318	0.178148
FAM102A.9	1.28898	0.0296472	0.178148
C19orf61.19	-1.02993	0.0296874	0.178148
MRAP.21	-1.1201	0.0297077	0.178148
SERPINE2.2	-3.35002	0.0297135	0.178148
TUBD1.17	1.94453	0.0297199	0.178148
TYMS.18	-1.20186	0.0297295	0.178148
ARMETL1.10	1.49424	0.0297521	0.178152
MTMR4.17	1.03701	0.0297798	0.178163
NUBP2.16	0.942669	0.0298153	0.178163
KIAA0391.14	1.23658	0.0298472	0.178163
NBEAL2.3	1.25046	0.0298624	0.178163
PIGM.1	1.39247	0.0298639	0.178163
NOS1AP.1	1.76446	0.0299083	0.178202
ST3GAL4.11	-1.19162	0.0299144	0.178202
ZNF92.7	1.65036	0.02999	0.178332
SSFA2.2	-1.50279	0.0299934	0.178332
CYLD.16	-1.48891	0.0300236	0.178332
IFI16.1	-5.27161	0.0300242	0.178332
ZNF552.19	2.34535	0.0301262	0.178703
CD27.12	2.21776	0.030135	0.178703
GTF2H1.11	-0.965714	0.0301528	0.178703
DHRS12.13	0.859893	0.0301842	0.178759
OSTM1.6	-1.13866	0.0303049	0.179216
FLT3LG.19	-1.53373	0.0303131	0.179216
POLG2.17	1.30789	0.0303278	0.179216
PCBP2.12	0.972555	0.0303557	0.179237
FOXP3.x	1.58741	0.0303755	0.179237
GLT8D4.3	-2.4339	0.0304215	0.179283
CD63.12	0.952661	0.0304405	0.179283
SLC39A14.8	-1.24524	0.0304677	0.179283
OSBPL6.2	-1.59148	0.0304772	0.179283
FAM72B.1	-1.45807	0.0304939	0.179283
FHL3.1	-2.13657	0.0305289	0.179297
C3orf14.3	1.3893	0.0305617	0.179297
CPEB3.10	1.74017	0.0305627	0.179297
TRIM9.14	2.80792	0.0306022	0.179399
ZNF391.6	-1.51292	0.0306428	0.179508
PDPK1.16	0.947152	0.0307132	0.179671
TWF2.3	-1.3043	0.0307475	0.179671
CXorf26.x	1.25633	0.0307758	0.179671
C10orf47.10	-1.14553	0.0308194	0.179671
CBR3.21	-1.53062	0.0308741	0.179671
DNAJC12.10	3.00997	0.03089	0.179671
IRX5.16	2.56591	0.0308917	0.179671
MAMLD1.x	-3.41399	0.0309032	0.179671
FZD4.11	1.58211	0.0309155	0.179671
ALDH1A3.15	-3.70449	0.0309317	0.179671
CHMP4A.14	1.50339	0.0309575	0.179671
RICH2.17	3.51644	0.0309622	0.179671
PRPS1.x	-1.52034	0.0309772	0.179671
PQLC3.2	1.48308	0.030981	0.179671
C6orf124.6	1.09299	0.0310511	0.179949
WBSCR16.7	1.03761	0.0311163	0.179979
ZNF467.7	2.64482	0.0311593	0.179979
CAV2.7	-6.2261	0.0311636	0.179979
HPX.11	3.44515	0.0311957	0.179979
MORN3.12	1.75459	0.0312011	0.179979
ZNF354C.5	-1.45433	0.0312059	0.179979
SRF.6	-1.00683	0.0312117	0.179979
BCAR3.1	-1.50198	0.0312501	0.180072
SOCS3.17	-2.04657	0.0313308	0.180409
ODZ2.5	4.99244	0.0313975	0.18059
RUSC2.9	-2.28597	0.0314068	0.18059
CRIM1.2	-2.08428	0.03144	0.180653
PELI2.14	-4.29452	0.0314699	0.180671
PEX11G.19	1.47607	0.0315391	0.180671
PRDM1.6	-3.0855	0.0315664	0.180671
TBX6.16	1.65955	0.0315665	0.180671
CCHCR1.6	-1.12193	0.0315843	0.180671
C10orf26.10	1.37747	0.031611	0.180671
SLC30A7.1	-1.3572	0.031633	0.180671
WASF1.6	-0.956125	0.031635	0.180671
ATP13A4.3	3.35582	0.0316437	0.180671
CD14.5	-3.94904	0.0316844	0.180714
DIAPH1.5	-0.786039	0.0316958	0.180714
SLC5A3.21	-1.22655	0.0317556	0.180828
PPM1A.14	0.798721	0.0317769	0.180828
PHTF1.1	-1.96748	0.0317826	0.180828
PRKCZ.1	0.96609	0.0319523	0.18146
CCDC103.17	1.59233	0.0319531	0.18146
MYO18A.17	-0.878252	0.0319743	0.18146
TEX10.9	-1.25274	0.0319858	0.18146
PMS2L5.7	1.27731	0.0320147	0.18146
EXOSC8.13	-0.933441	0.0320281	0.18146
PCLO.7	1.39148	0.0320727	0.181587
GNA13.17	1.11016	0.0321825	0.182014
RASSF5.1	-2.05601	0.0321932	0.182014
SFMBT1.3	-0.996649	0.0322757	0.182068
SFRS5.14	0.844053	0.032285	0.182068
DHRS7.14	0.938042	0.0322866	0.182068
PPP4R1.18	-1.35668	0.0322927	0.182068
KCNH1.1	4.50749	0.0323149	0.182068
BACE2.21	-2.36394	0.0323764	0.182214
GPC6.13	5.46367	0.0324013	0.182214
SLC29A2.11	0.99544	0.0324083	0.182214
PHC2.1	-1.5598	0.0324921	0.182559
HBEGF.5	-3.24354	0.0325499	0.182619
SHROOM4.x	-2.41702	0.0325511	0.182619
ANXA11.10	-0.965305	0.0325783	0.182619
CCNG2.4	1.99886	0.0325929	0.182619
NAV2.11	-3.77605	0.0326322	0.182712
CENTA1.7	1.27989	0.0326935	0.182785
TARS2.1	0.815063	0.0327119	0.182785
GTSE1.22	-1.05163	0.0327481	0.182785
LIMS1.2	-0.926984	0.0327539	0.182785
LAT.16	1.37489	0.0327804	0.182785
IMPACT.18	1.65952	0.0327804	0.182785
THRA.17	2.19007	0.0328646	0.183128
SPTBN1.2	-1.23624	0.0329885	0.183359
SLC7A2.8	7.5669	0.0329897	0.183359
PRODH.22	5.14163	0.0330073	0.183359
C5.9	1.03997	0.0330109	0.183359
NPEPPS.17	1.1873	0.033033	0.183359
ODF2L.1	-1.50586	0.0330417	0.183359
TMEM134.11	1.46208	0.0330935	0.183521
MAP1A.15	2.68999	0.0331181	0.183532
CRNKL1.20	1.19512	0.0331819	0.183563
AQP1.7	-2.71054	0.0331902	0.183563
WNT5B.12	-3.33411	0.0331917	0.183563
WBSCR22.7	0.969249	0.0332151	0.183567
SGEF.3	1.74561	0.0332383	0.18357
VEZF1.17	1.36547	0.0332989	0.183665
ST3GAL3.1	-2.05069	0.0333241	0.183665
BCAS4.20	1.5714	0.0333449	0.183665
PCDHA11.5	5.4135	0.0333571	0.183665
FDX1.11	-0.961186	0.0333907	0.183665
UBE2Q2.15	1.02166	0.0333987	0.183665
NPC1L1.7	1.91492	0.0334201	0.183665
ABCF2.7	-0.855167	0.0334366	0.183665
RPS6KB1.17	2.20196	0.033522	0.18382
JRKL.11	-1.10656	0.0335287	0.18382
C14orf93.14	0.99539	0.0335629	0.18382
QSOX2.9	-1.16328	0.0335768	0.18382
KIAA1370.15	1.68846	0.0335782	0.18382
HLA-A29-1.6	-3.59759	0.0336423	0.184047
KIAA0020.9	-1.35611	0.0337295	0.184399
ARHGEF4.2	-2.05119	0.033772	0.184507
TMEM199.17	0.884858	0.0338642	0.184809
LOC201175.17	-1.32372	0.0338998	0.184809
S100A13.1	1.19161	0.0339124	0.184809
IL3RA.x	2.18551	0.0339184	0.184809
CD163L1.12	-4.35252	0.0339411	0.184809
CALB2.16	-3.73673	0.0339751	0.184869
C18orf32.18	1.90227	0.0340893	0.185367
MOAP1.14	0.955544	0.034126	0.185442
ROBO3.11	-2.62268	0.0342089	0.185767
TCF20.22	-0.899063	0.0343457	0.186245
GEMIN8.x	1.01745	0.0343617	0.186245
FBLIM1.1	-2.46597	0.0343686	0.186245
TFCP2L1.2	-3.43092	0.0343888	0.186245
LRRC46.17	1.79165	0.0344856	0.186645
ISOC1.5	1.20873	0.0345657	0.186935
KLHDC1.14	1.87768	0.0346047	0.186935
C11orf80.11	1.19665	0.0346083	0.186935
MAP7D1.1	-1.03089	0.0346476	0.186979
LEMD3.12	1.09503	0.0346626	0.186979
FLJ23834.7	2.94053	0.0346987	0.187049
JMJD5.16	1.39156	0.0347265	0.187075
HSD17B11.4	-3.31227	0.0347839	0.187136
PANK2.20	-0.953444	0.0347962	0.187136
RHOG.11	-1.17599	0.0348071	0.187136
TWSG1.18	-1.20285	0.0348578	0.187284
RNF208.9	1.584	0.0349213	0.187501
TBKBP1.17	1.09818	0.0349447	0.187502
RRM2B.8	0.990046	0.0349914	0.187629
ENPP1.6	3.15065	0.0350878	0.188021
HARS2.5	1.00965	0.0351764	0.188218
PROCA1.17	2.36304	0.0351886	0.188218
ACTBL2.5	-3.39699	0.0351941	0.188218
DKFZp667G2110.3	-1.69148	0.035283	0.188569
CST3.20	8.1338	0.0353629	0.188871
HOXC5.12	1.7719	0.0353962	0.188885
KATNB1.16	-1.05341	0.035412	0.188885
C17orf62.17	0.977473	0.0354637	0.188926
JARID1B.1	1.31945	0.0354864	0.188926
ABCD3.1	-1.18241	0.0354979	0.188926
OLA1.2	-0.93834	0.0355757	0.188926
RPL30.8	1.01997	0.0355858	0.188926
C1orf35.1	1.21784	0.0356117	0.188926
RHOT2.16	1.05212	0.0356203	0.188926
UBR7.14	1.0106	0.0356336	0.188926
CAP1.1	-1.03777	0.035644	0.188926
FOXN2.2	-1.35625	0.0356713	0.188926
ZNF584.19	-0.946613	0.035676	0.188926
KIAA0754.1	-2.91514	0.0357268	0.189072
WDR20.14	0.865118	0.0358242	0.189463
KIAA1598.10	1.19204	0.0358946	0.189518
C13orf3.13	-0.932264	0.0358956	0.189518
ITGB2.21	-1.48221	0.0359046	0.189518
USP7.16	0.906371	0.0359836	0.189722
C1orf115.1	3.16096	0.0359902	0.189722
MAGED1.x	1.41394	0.0360365	0.189843
ELF5.11	6.01998	0.0361484	0.190302
EMILIN2.18	-3.25934	0.0361706	0.190302
BLVRA.7	1.55787	0.0362441	0.190405
E2F3.6	-1.04344	0.0362454	0.190405
ZNF24.18	1.4808	0.0362644	0.190405
MTERFD3.12	1.17214	0.0363243	0.190405
STAU2.8	1.23327	0.0363315	0.190405
IL17RE.3	1.37159	0.0363746	0.190405
KIF3C.2	-2.04335	0.0363854	0.190405
SLC24A1.15	1.49594	0.0363981	0.190405
TGFBR2.3	-4.8294	0.0364016	0.190405
C12orf26.12	1.47686	0.0364727	0.190642
MDFI.6	-4.55448	0.0365115	0.190642
HIST1H2AC.6	1.56453	0.0365272	0.190642
UBXD4.2	-1.022	0.0365662	0.190642
LRIG2.1	-1.0366	0.0365706	0.190642
HDX.x	4.425	0.0365984	0.190642
PSMB10.16	-2.04923	0.0366114	0.190642
SERAC1.6	-0.952905	0.0367972	0.191186
TIGD6.5	1.20288	0.0368023	0.191186
TEGT.12	0.89851	0.0368029	0.191186
BBS4.15	1.05144	0.0368102	0.191186
PMM2.16	0.829095	0.0369611	0.191728
PTPRJ.11	-1.15854	0.0370149	0.191728
NEK8.17	1.01525	0.0370294	0.191728
XKR6.8	-3.72675	0.0370373	0.191728
C2orf13.2	-3.83119	0.0370565	0.191728
NAAA.4	2.03449	0.0370565	0.191728
ATP5G1.17	1.187	0.03711	0.191781
ITGAL.16	4.12567	0.0371141	0.191781
KIF2C.1	-1.04393	0.0371531	0.191788
CNPY4.7	1.28088	0.0371626	0.191788
ERCC4.16	1.48874	0.0372323	0.192025
FAM89A.1	-2.13425	0.0372587	0.192039
ECOP.7	-2.4116	0.0372986	0.192123
NDUFB1.14	0.914619	0.0373883	0.192333
ALMS1.2	-1.12365	0.0374006	0.192333
RNF180.5	4.20288	0.0374331	0.192333
EMP2.16	1.61407	0.0374557	0.192333
SLC2A10.20	2.61033	0.0374581	0.192333
MPP1.x	-4.0733	0.0375162	0.192509
SPNS1.16	1.10331	0.0376315	0.19279
KISS1.1	-2.66397	0.0376342	0.19279
MX1.21	-2.6537	0.0376422	0.19279
LOC129293.2	-3.6582	0.0377049	0.192989
SLC22A4.5	-1.67077	0.0377854	0.193189
KATNAL1.13	-1.24614	0.0377917	0.193189
FMO4.1	1.91622	0.037858	0.193406
MMP25.16	1.51279	0.037907	0.193535
PARVB.22	2.91974	0.0379839	0.193805
UBE2Z.17	1.42506	0.0380589	0.194066
SLC35F2.11	-1.51684	0.0381289	0.194301
RBM8A.1	0.872386	0.0382262	0.19455
ORMDL1.2	-0.904533	0.0382449	0.19455
AGPS.2	-6.34213	0.0382497	0.19455
INTS2.17	1.35792	0.0383363	0.194867
TAP1.6	-1.43066	0.0383982	0.195039
SEPSECS.4	0.897076	0.0384557	0.195039
KIAA1462.10	-3.26809	0.0384797	0.195039
INCA1.17	0.930633	0.0385099	0.195039
TTC39C.18	1.75	0.038516	0.195039
ZNF697.1	-1.88145	0.038526	0.195039
BAK1.6	-0.916044	0.0385384	0.195039
LEPRE1.1	-1.59861	0.0385985	0.19522
SEPT6.x	-2.82989	0.0386223	0.19522
DAB2.5	-2.7268	0.0386692	0.195285
PDZK1IP1.1	-4.42706	0.0386836	0.195285
ZIC2.13	-1.18862	0.0387075	0.195285
LCN2.9	-5.04017	0.0387855	0.19546
FXYD5.19	-4.24411	0.0388064	0.19546
TGM3.20	3.21301	0.0388145	0.19546
NUP93.16	-0.959345	0.0389579	0.196061
CISH.3	2.78736	0.0391674	0.19697
ELL3.15	1.84579	0.0391963	0.19697
COPS3.17	-0.89242	0.0392114	0.19697
SGK1.6	-2.80288	0.0392472	0.197006
FBXO30.6	-0.871567	0.0392673	0.197006
ISCA2.14	0.96755	0.039352	0.197309
MLLT4.6	-1.41766	0.0394336	0.197596
TUBB6.18	-1.65369	0.0394636	0.197624
XPC.3	1.23964	0.039529	0.197779
HACE1.6	-1.04611	0.0395433	0.197779
MBIP.14	1.33308	0.0396962	0.198349
CLIC4.1	-1.35002	0.0397317	0.198349
RCN1.11	-2.30268	0.0397382	0.198349
ZNF821.16	1.36131	0.0397551	0.198349
ZDHHC24.11	1.08998	0.0398279	0.198555
WDR25.14	1.10151	0.0398453	0.198555
NUP155.5	-1.03655	0.039938	0.198673
PPP1R13B.14	1.3836	0.0399696	0.198673
NUP153.6	-0.91708	0.0399877	0.198673
JOSD1.22	-0.830433	0.0399877	0.198673
ARHGAP4.x	2.69253	0.0399916	0.198673
LFNG.7	2.27834	0.0400809	0.198971
C9orf117.9	1.0128	0.0401426	0.198971
ZNF25.10	0.896804	0.0401705	0.198971
C1orf102.1	1.10475	0.0401707	0.198971
GPR116.6	-2.9604	0.0401742	0.198971
PCYOX1L.5	1.4301	0.0402203	0.199077
C14orf45.14	1.08017	0.0402857	0.19922
BCAS3.17	2.88344	0.0402982	0.19922
CBX5.12	1.57925	0.0403547	0.199378
NBN.8	0.843016	0.0404169	0.199563
PPP1R16A.8	1.1194	0.0404435	0.199573
GJD3.17	1.36775	0.0405047	0.199609
DTX3L.3	-1.45841	0.0405147	0.199609
FAM84B.8	0.997571	0.0405246	0.199609
ZNF707.8	0.957179	0.0405835	0.199778
ANXA1.9	-3.48679	0.040736	0.200406
CCDC136.7	-1.4695	0.040773	0.200467
CCDC18.1	-1.32716	0.0408105	0.20053
ANKRD28.3	-1.01601	0.0409021	0.200858
COQ6.14	1.13292	0.0409996	0.201003
CNIH2.11	2.98347	0.0410242	0.201003
MLH3.14	0.879562	0.0410493	0.201003
SAMD8.10	-1.0257	0.0410541	0.201003
COMMD10.5	0.817656	0.0410556	0.201003
RNF217.6	-3.12409	0.0411271	0.201151
RHEB.7	-1.10436	0.0411391	0.201151
LYPD3.19	3.73606	0.0411688	0.201151
LYCAT.2	-0.884151	0.0411878	0.201151
MID1.x	-1.40911	0.0412373	0.201151
PARD6G.18	1.45842	0.0412752	0.201151
BMP1.8	-1.76293	0.0413092	0.201151
NUDT17.1	2.10152	0.0413133	0.201151
TUBB.6	-0.990056	0.041329	0.201151
NAALADL2.3	3.3679	0.041334	0.201151
GRHL3.1	3.78908	0.0414107	0.201373
ANKRD24.19	1.86639	0.0414549	0.201373
PEX11B.1	1.41997	0.0414821	0.201373
NBPF20.1	-1.10136	0.041496	0.201373
TRIP11.14	1.04768	0.0415429	0.201373
C10orf116.10	3.01649	0.0415518	0.201373
DPYSL2.8	-1.85009	0.0415534	0.201373
SLC25A26.3	-0.937105	0.0416098	0.201486
SH2B3.12	-2.89017	0.0416491	0.201486
GBE1.3	-1.50557	0.0416513	0.201486
HDGFRP3.15	4.3269	0.0417322	0.201552
TCTEX1D2.3	1.2815	0.0418073	0.201552
CHAC2.2	-1.1534	0.0418212	0.201552
SIN3B.19	-1.23121	0.0418599	0.201552
CAV1.7	-5.85778	0.0418924	0.201552
CRISP3.6	5.90891	0.0419051	0.201552
LOC339123.16	1.15604	0.0419196	0.201552
DCP1B.12	4.33413	0.0419226	0.201552
FGFR4.5	2.49505	0.0419271	0.201552
ZYX.7	-1.75538	0.0419359	0.201552
CKAP2L.2	-1.25714	0.0419677	0.201552
RHOBTB2.8	0.972797	0.0419816	0.201552
PJA1.x	-1.01991	0.0419955	0.201552
NFYC.1	-1.03719	0.042013	0.201552
C15orf39.15	-1.0065	0.042141	0.202047
R3HDM2.12	0.996558	0.0422253	0.202304
PAX2.10	3.83504	0.0422445	0.202304
NPAT.11	-1.12549	0.0422716	0.202314
TAF9B.x	0.944248	0.0423718	0.202356
RNF40.16	0.909601	0.0423743	0.202356
PIK3AP1.10	-1.64775	0.0423911	0.202356
HN1L.16	0.92225	0.0424044	0.202356
SPOCK2.10	-1.98644	0.0424052	0.202356
USP24.1	-1.22495	0.0426015	0.202833
TM4SF19.3	-2.6102	0.0426036	0.202833
RUNDC2A.16	1.37949	0.0426281	0.202833
BOLA1.1	2.42273	0.0426325	0.202833
PMS2.7	1.03724	0.0426337	0.202833
ADCK5.8	1.15366	0.0426553	0.202833
MITF.3	-1.73039	0.0427403	0.202886
CDKL1.14	-1.47252	0.0427479	0.202886
ZNF512B.20	1.24888	0.0427555	0.202886
KIAA0195.17	0.88541	0.0427666	0.202886
SPOP.17	1.35746	0.042851	0.203168
GSTO2.10	3.0621	0.0429104	0.203331
LYRM5.12	1.26062	0.0429796	0.203488
DCLK2.4	-2.17918	0.0429957	0.203488
PPA2.4	0.924245	0.0430188	0.203488
FAM136A.2	-0.831759	0.0430577	0.203553
DARS.2	-0.82108	0.0431842	0.203988
TRIM14.9	-1.04583	0.0432001	0.203988
C20orf11.20	0.982276	0.0434986	0.205278
MAP2K6.17	2.51249	0.0436518	0.205812
NCK2.2	-1.13533	0.0436822	0.205812
PARP12.7	-1.19019	0.0436879	0.205812
ATP10D.4	-2.10878	0.0437845	0.20604
ORMDL2.12	1.01804	0.0438362	0.20604
MAP3K5.6	-1.96383	0.0438612	0.20604
GUCY1A2.11	3.41518	0.0438751	0.20604
ZNF620.3	1.12497	0.0438873	0.20604
DOCK5.8	-0.920788	0.0439053	0.20604
MYO10.5	-1.65216	0.0439765	0.20604
TCF19.6	-1.15336	0.0439811	0.20604
RPS6KB2.11	1.29847	0.0440028	0.20604
MIER1.1	-0.997432	0.0440483	0.20604
DDEF1.8	-1.10696	0.0440819	0.20604
ZNF740.12	0.982037	0.0440907	0.20604
NUP98.11	-1.10116	0.0440919	0.20604
FAM63A.1	1.30161	0.044092	0.20604
TAF13.1	-1.45436	0.044121	0.206055
EIF2S2.20	-1.34857	0.0441461	0.206055
CDK5RAP3.17	1.20899	0.0441824	0.206106
KCTD20.6	-0.989529	0.0442185	0.206126
PCOLCE2.3	-2.83884	0.0442611	0.206126
MAP7D3.x	-5.21782	0.0442683	0.206126
C22orf23.22	-1.65446	0.0442885	0.206126
TAF12.1	1.23202	0.0443269	0.206181
UNC13D.17	-1.58226	0.0443512	0.206181
TRIM37.17	2.08049	0.044397	0.206276
ZNF438.10	-1.28762	0.0444358	0.206338
RALGPS1.9	1.57572	0.0445244	0.206631
KIAA1609.16	-1.1948	0.0446599	0.207085
HSCB.22	1.02199	0.0446733	0.207085
UBE2J1.6	-1.23862	0.0447053	0.207115
C6orf165.6	2.66832	0.0447529	0.207192
SMC6.2	-1.01627	0.0447828	0.207192
LRIG1.3	1.41079	0.0448198	0.207192
POLS.5	-0.911553	0.0448241	0.207192
CARS.11	-1.33598	0.04492	0.207517
CHRM3.1	-3.18638	0.044986	0.20766
CCRK.9	1.06621	0.0450124	0.20766
APLN.x	-2.13134	0.0450279	0.20766
ZNF582.19	-4.34984	0.0450851	0.207806
EME1.17	1.85913	0.0451167	0.207833
HOMEZ.14	2.21625	0.0451997	0.207992
HSPB8.12	5.05287	0.0452156	0.207992
CLK3.15	0.930001	0.0452281	0.207992
DNAJB6.7	-1.32031	0.0452921	0.208115
TARS.5	-1.43388	0.0453379	0.208115
RABL5.7	0.834785	0.0453488	0.208115
RTCD1.1	-1.36493	0.0453576	0.208115
ZNF585B.19	-1.81707	0.0454299	0.208242
NLRC3.16	1.93236	0.0454576	0.208242
KIAA1975.10	1.48748	0.0454622	0.208242
C18orf56.18	-1.4869	0.0455062	0.208326
C3orf64.3	-1.76653	0.0455824	0.20848
LZTS2.10	1.05497	0.0456086	0.20848
ANKRD1.10	-4.4199	0.0456171	0.20848
TAOK2.16	0.930554	0.0456462	0.208496
LRRC42.1	-1.13943	0.0457133	0.208685
ZNF623.8	0.986301	0.0457973	0.208885
REEP6.19	1.90426	0.0458087	0.208885
C16orf14.16	0.831598	0.0458696	0.208915
DISC1.1	-2.00861	0.0458787	0.208915
PDXDC1.16	1.24054	0.0458927	0.208915
CENPM.22	-1.08048	0.045952	0.208967
NOL10.2	-0.812263	0.045978	0.208967
C2CD2.21	-1.64678	0.0459813	0.208967
SLC22A20.11	-1.9487	0.0460343	0.209
SDSL.12	1.08242	0.0460681	0.209
ADRA2C.4	3.41262	0.0460822	0.209
LIMK1.7	-1.34138	0.0460917	0.209
FTSJ1.x	-1.03994	0.0461715	0.209173
FEZ1.11	4.03902	0.0462002	0.209173
TRIM39.6	-0.89604	0.0462097	0.209173
ESRRG.1	2.98861	0.046233	0.209173
C11orf41.11	-4.51356	0.0463218	0.209457
DSE.6	-3.09	0.0463743	0.209578
PSEN1.14	0.756677	0.0465302	0.210114
SLC29A4.7	1.31774	0.0465448	0.210114
ATP6V1E2.2	-1.17309	0.0466112	0.21027
TRIM36.5	1.90172	0.0466312	0.21027
FAM116A.3	-0.944249	0.0468383	0.211071
THUMPD1.16	0.809915	0.0468974	0.211071
PTK7.6	-1.38444	0.0469242	0.211071
C14orf174.14	2.48896	0.0469907	0.211071
GLS.2	-1.54751	0.0469931	0.211071
MBD1.18	0.809511	0.0470002	0.211071
ZNF629.16	1.04576	0.0470069	0.211071
CTDP1.18	1.0184	0.0470171	0.211071
BBS5.2	3.2393	0.0470798	0.211235
VPS45.1	0.945924	0.047112	0.211263
CD99L2.x	-1.09012	0.0471821	0.21146
TSR1.17	-1.01131	0.0472378	0.211489
TM2D3.15	0.8399	0.0472406	0.211489
PLAC8.4	-4.11463	0.04733	0.211693
ACTN4.19	-1.128	0.0473383	0.211693
HDHD2.18	1.2546	0.0474137	0.211859
HLA-DQB1.6	4.14973	0.0474305	0.211859
GPHN.14	0.792943	0.047454	0.211859
DDAH1.1	-1.06563	0.0475016	0.211955
HAP1.17	2.64304	0.0475626	0.212111
MEIS1.2	1.65833	0.0476021	0.21217
ARID2.12	0.943231	0.0476423	0.212232
UTP23.8	0.862832	0.0476989	0.212334
ZNF484.9	-1.41904	0.0477174	0.212334
RGNEF.5	-2.07784	0.0478452	0.212656
TRIM16L.17	-2.14912	0.0478536	0.212656
TDG.12	0.81325	0.0478908	0.212656
RRAGD.6	-1.69064	0.0479201	0.212656
ZNF263.16	0.842607	0.0479209	0.212656
EXTL2.1	-1.47731	0.0480053	0.212914
ATP11A.13	-1.52857	0.0481512	0.213409
NUAK1.12	-2.46894	0.048171	0.213409
ZNF319.16	-1.10607	0.0482813	0.213409
COX6C.8	1.68537	0.0483031	0.213409
SFRS9.12	0.868614	0.0483141	0.213409
TMEM151A.11	2.75089	0.048322	0.213409
PHLDB3.19	1.8546	0.048326	0.213409
FAM117A.17	1.3882	0.0483327	0.213409
AK2.1	-1.04174	0.0483538	0.213409
C3orf33.3	0.870255	0.0484278	0.213619
MGAT1.5	-0.800051	0.0485189	0.213772
OTUD4.4	-0.889586	0.0485851	0.213772
MGC48628.4	2.36959	0.0486054	0.213772
GLDC.9	3.55307	0.0486141	0.213772
HAPLN3.15	-3.16941	0.0486266	0.213772
FOXC1.6	-2.65665	0.0486422	0.213772
PCDHA1.5	3.65009	0.0486666	0.213772
EARS2.16	0.898137	0.0486734	0.213772
ST7L.1	-1.01034	0.0488514	0.214437
PAK1IP1.6	-1.22549	0.0488868	0.214477
STK36.2	0.961653	0.0489608	0.214685
C1orf9.1	1.00409	0.0490527	0.214972
ZNF687.1	1.13838	0.0490909	0.215023
TXNRD2.22	0.830119	0.0491197	0.215033
RADIL.7	3.00348	0.0492267	0.21513
C20orf111.20	-1.12153	0.0492355	0.21513
CHAF1B.21	-1.00125	0.0492363	0.21513
RECQL5.17	0.996966	0.0492481	0.21513
MAPK3.16	0.99192	0.0492981	0.215233
SNRPE.1	0.947265	0.0493564	0.215371
UTX.x	0.865562	0.0494536	0.215513
PLA2G12A.4	0.887621	0.0494746	0.215513
AP4S1.14	1.52334	0.0494786	0.215513
PSEN2.1	0.818181	0.049524	0.215513
FAM83H.8	1.84238	0.0495517	0.215513
AVIL.12	1.18842	0.0495706	0.215513
MGAT3.22	3.25081	0.0495931	0.215513
GNA15.19	-3.84187	0.0496279	0.215513
CLSPN.1	-0.938283	0.0496436	0.215513
ATP7B.13	1.63961	0.0496546	0.215513
ARL15.5	1.20917	0.0497219	0.215601
PLA2G4F.15	4.27925	0.0497327	0.215601
TM4SF1.3	-3.59701	0.0497548	0.215601
PDXP.22	-0.922101	0.0499279	0.216236
CYB5D1.17	1.09504	0.0499946	0.216398
