# Supplementary material for: Integrated Analysis of Gene Expression, CpG Island Methylation, and Gene Copy Number in Breast Cancer Cells by Deep Sequencing
Source: PLoS One. 2011 Feb 25;6(2):e17490. doi: 10.1371/journal.pone.0017490 (PMC3045451; doi:10.1371/journal.pone.0017490)
Supplement: Table S3 — Differentially methylated CpG islands and their associated genes (within 5 kb of transcript start). Both methylation and gene expression data are included. Note that there are 444 unique CpG islands differentially methylated, with 469 unique associated genes in the table. Some CpG islands (36) have more than one gene within 5 kb window. Some genes (10) have more than one CpG islands within 5 kb of its transcript start. (XLSX) [file pone.0017490.s003.xlsx]

## Sheet: CpG_sig
geneSymbol	Transcript	chrom	strand	TranscriptStart	TranscriptEnd	CpGisland.location	MeanMethylationDifferencebetweenER+andER-Celllines	Differential_Methylation_P_Value	Differential_Methylation_q_value	CpGIslandDistanceToGeneStart	GeneExpression_log2FC	GeneExpression_PValue	Gene_Expression_qvalue
HTR1E	NM_000865	chr6	+	87703742	87783109	chr6.87703972-87704426	-69.9703	2.32e-06	0.00695872	230	1.38657	0.154248	0.314373
GATA3	NM_002051	chr10	+	8136672	8157170	chr10.8140390-8140774	-84.2165	2.54e-06	0.00695872	3718	4.20519	0.00900635	0.122378
MALL	NM_005434	chr2	-	110198743	110231432	chr2.110230234-110230876	42.3963	9.65e-06	0.0132051	556	-4.32328	0.0129815	0.13857
BAMBI	NM_012342	chr10	+	29006429	29011874	chr10.29005710-29007272	-10.6954	2.71e-05	0.0326665	-719	1.89638	0.128978	0.295288
GHR	NM_000163	chr5	+	42459782	42757683	chr5.42460095-42460804	-85.2583	2.73e-05	0.0326665	313	7.49714	0.0038818	0.0843751
KCNB1	NM_004975	chr20	-	47421911	47532588	chr20.47531919-47532967	-70.2855	2.9e-05	0.0326665	-379	0.435231	0.781125	0.593781
KCNH1	NM_172362	chr1	-	208918279	209374080	chr1.209373290-209374298	-26.2353	5.39e-05	0.0528678	-218	4.50749	0.0323149	0.182068
AMPH	NM_001635	chr7	-	38389829	38637545	chr7.38636964-38637533	-47.5928	5.57e-05	0.0528678	12	5.07664	6.33e-05	0.0131592
CNTNAP2	NM_014141	chr7	+	145444385	147749019	chr7.145443963-145445017	-69.5435	5.73e-05	0.0528678	-422	6.65892	0.0126783	0.137446
C6orf97	NM_025059	chr6	+	151856867	151984020	chr6.151856673-151857220	-86.1891	6.07e-05	0.0528678	-194	8.62367	4.1e-07	0.000831026
ZNF703	NM_025069	chr8	+	37672458	37675554	chr8.37671102-37675080	-46.005	7.83e-05	0.0652511	-1356	1.75235	0.00901036	0.122378
KCTD11	NM_001002914	chr17	+	7195931	7198986	chr17.7194022-7194488	-79.0775	8.5e-05	0.0652599	-1909	0.101902	0.890701	0.623935
KCNMB4	NM_014505	chr12	+	69046328	69111245	chr12.69045704-69047319	-3.02034	9.61e-05	0.0707849	-624	2.21425	0.0611112	0.231672
ASTN2	NM_198186	chr9	-	118227327	119217138	chr9.119215074-119217317	-64.7977	0.00012762	0.0788651	-179	2.77352	0.000400392	0.033401
NEXN	NM_144573	chr1	+	78126787	78182166	chr1.78126969-78127261	76.2177	0.000143929	0.0810959	182	-3.69148	0.00943733	0.123809
MFSD10	NM_001146069	chr4	-	2902086	2906384	chr4.2905259-2906813	-16.987	0.000179345	0.094238	-429	0.375195	0.487905	0.495891
UPP1	NM_181597	chr7	+	48094879	48114855	chr7.48095252-48096486	5.42925	0.000189252	0.0954082	373	-4.35814	4.14e-05	0.0101583
MED12L	NM_053002	chr3	+	152287365	152634500	chr3.152285683-152287855	-25.045	0.000253768	0.117678	-1682	2.02635	0.229795	0.370246
MSI1	NM_002442	chr12	-	119263515	119291341	chr12.119290634-119291409	-31.9111	0.000283894	0.126478	-68	4.54455	0.00125104	0.0514867
FAM32A	NM_014077	chr19	+	16157234	16163857	chr19.16157300-16157742	-1.16208	0.000347755	0.148043	66	-0.315432	0.495054	0.498656
ACOT4	NM_152331	chr14	+	73128162	73132223	chr14.73128153-73128869	-2.88059	0.000356605	0.148511	-9	2.38085	0.0257475	0.169302
COASY	NM_025233	chr17	+	37967617	37971821	chr17.37972212-37973159	-8.80663	0.000403433	0.161012	4595	-0.0295334	0.965099	0.642807
MLX	NM_170607	chr17	+	37972603	37978747	chr17.37972212-37973159	-8.80663	0.000403433	0.161012	-391	-0.173403	0.729257	0.578806
SPATA2L	NM_152339	chr16	-	88290265	88295600	chr16.88294754-88296383	-1.79158	0.000419112	0.163856	-783	1.21213	0.0290826	0.177152
CA8	NM_004056	chr8	-	61263976	61356508	chr8.61355866-61356749	-38.6835	0.000434098	0.166321	-241	7.19251	0.00098352	0.0477096
ATP2A3	NM_174954	chr17	-	3773917	3814485	chr17.3813808-3814844	-37.2232	0.00048937	0.169043	-359	4.5503	0.0074053	0.112201
TRADD	NM_003789	chr16	-	65745589	65751313	chr16.65746114-65747153	-22.9837	0.000504933	0.169043	4160	-0.129968	0.799155	0.59817
FBXL7	NM_012304	chr5	+	15553304	15992900	chr5.15553076-15553923	-46.1689	0.000564435	0.171952	-228	3.02664	0.0670361	0.236922
DALRD3	NM_018114	chr3	-	49027438	49033471	chr3.49030218-49031321	-1.79102	0.000607473	0.179037	2150	0.757788	0.132595	0.298701
SUV420H1	NM_017635	chr11	-	67680082	67737360	chr11.67736587-67738644	-1.12432	0.000665145	0.193064	-1284	1.18595	0.0702891	0.240224
CPNE8	NM_153634	chr12	-	37332268	37585687	chr12.37585515-37585896	76.9906	0.000707374	0.19996	-209	-6.29797	0.00121013	0.0514867
CHST11	NM_018413	chr12	+	103374907	103676013	chr12.103374383-103376525	15.7793	0.000709781	0.19996	-524	-2.9381	0.0054229	0.0988012
ENTPD2	NM_001246	chr9	-	139062373	139068326	chr9.139067727-139068758	-19.413	0.00075549	0.203845	-432	4.53842	0.0130477	0.13857
ZNF696	NM_030895	chr8	+	144444933	144453495	chr8.144449305-144450650	-1.36739	0.000840095	0.213163	4372	0.807342	0.0959939	0.266145
SDC2	NM_002998	chr8	+	97575057	97693213	chr8.97574923-97576783	-12.4989	0.000845663	0.213163	-134	6.88811	0.00644417	0.105124
TRIM45	NM_025188	chr1	-	117455199	117465934	chr1.117465703-117466671	-27.2055	0.000922358	0.220871	-737	1.05306	0.0503605	0.21673
SHANK3	NM_001080420	chr22	+	49459935	49518507	chr22.49458801-49460608	-9.23671	0.000940151	0.222352	-1134	-0.986111	0.246353	0.380991
TNFRSF11A	NM_003839	chr18	+	58143527	58204484	chr18.58143049-58144536	-7.85724	0.000967014	0.222379	-478	-0.94111	0.346886	0.434332
GNB2L1	NM_006098	chr5	-	180596533	180603512	chr5.180602979-180603602	-7.02177	0.000985831	0.222379	-90	-0.270659	0.557303	0.521933
CNNM2	NM_017649	chr10	+	104668103	104828230	chr10.104667305-104669302	-16.3276	0.00101233	0.223531	-798	0.474155	0.512324	0.505341
PCSK7	NM_004716	chr11	-	116580997	116608021	chr11.116608935-116609151	-18.1511	0.00110363	0.237554	-1130	-0.257666	0.615626	0.541961
RNF214	NM_207343	chr11	+	116608613	116661614	chr11.116608935-116609151	-18.1511	0.00110363	0.237554	322	-0.414378	0.387565	0.455848
DNMT3A	NM_175629	chr2	-	25309348	25418963	chr2.25416813-25417165	-45.4824	0.00114842	0.24428	1798	0.176241	0.840706	0.609286
PCDHGA7	NM_018920	chr5	+	140742650	140872730	chr5.140747380-140747879	-63.7108	0.00117313	0.24428	4730	2.18422	0.19369	0.345758
ARL16	NM_001040025	chr17	-	77258628	77261359	chr17.77265567-77265920	-3.73882	0.00136564	0.268127	-4561	0.450038	0.509629	0.504909
HGS	NM_004712	chr17	+	77261424	77279552	chr17.77265567-77265920	-3.73882	0.00136564	0.268127	4143	-0.0646637	0.88204	0.621779
P2RX2	NM_170682	chr12	+	131705475	131709045	chr12.131705995-131706629	-52.3814	0.00139536	0.270009	520	4.56106	0.00404444	0.0851703
CAV2	NM_198212	chr7	+	115926679	115935831	chr7.115927010-115927588	47.2451	0.00147689	0.280128	331	-6.2261	0.0311636	0.179979
USF2	NM_207291	chr19	+	40451735	40462558	chr19.40450041-40451510	-12.3198	0.00163912	0.296956	-1694	-0.236078	0.624404	0.544203
DOCK1	NM_001380	chr10	+	128584012	129140770	chr10.128583599-128585038	-2.97171	0.00164313	0.296956	-413	-0.63548	0.272029	0.394462
GRIK3	NM_000831	chr1	-	37033714	37272431	chr1.37270964-37273211	-66.3337	0.00169569	0.296956	-780	10.5674	1.14e-05	0.00729681
TFAP2A	NM_001042425	chr6	-	10504901	10527783	chr6.10529400-10529713	-5.79967	0.00171171	0.296956	-1930	1.14789	0.326895	0.42567
PALM	NM_002579	chr19	+	659952	699330	chr19.659530-659742	-19.4015	0.00174191	0.296956	-422	2.05266	0.00293547	0.0732292
EGR3	NM_004430	chr8	-	22601118	22606760	chr8.22603431-22609372	-25.2618	0.00176185	0.296956	-2612	3.03338	0.122198	0.290078
CACNA1D	NM_001128839	chr3	+	53504070	53821532	chr3.53502967-53505146	-21.2444	0.00177287	0.296956	-1103	3.64055	0.119869	0.288376
GON4L	NM_001037533	chr1	-	153986133	154093596	chr1.154096819-154097113	-42.5454	0.00183776	0.296956	-3517	0.000460817	0.999064	0.648933
NPEPL1	NM_024663	chr20	+	56701267	56724307	chr20.56700933-56701827	-15.767	0.00188103	0.296956	-334	1.95752	0.0202093	0.159385
IGFBP2	NM_000597	chr2	+	217206371	217237403	chr2.217206056-217207092	-40.2206	0.00194001	0.296956	-315	3.70181	0.0177349	0.149156
C6orf154	NM_001012974	chr6	-	43582684	43586402	chr6.43585199-43586531	-13.0454	0.00194262	0.296956	-129	2.46716	0.0118236	0.132838
PALM	NM_002579	chr19	+	659952	699330	chr19.660129-660990	-9.90592	0.00194696	0.296956	177	2.05266	0.00293547	0.0732292
CRIP2	NM_001312	chr14	+	105012175	105017545	chr14.105011370-105012945	-5.54585	0.00205514	0.302849	-805	5.16277	0.000819532	0.0446216
SLC6A6	NM_003043	chr3	+	14419109	14505861	chr3.14418633-14419581	-3.44313	0.00210707	0.305262	-476	-1.53649	0.108468	0.279015
JAM2	NM_021219	chr21	+	25933459	26009106	chr21.25933495-25934269	-40.9756	0.00210956	0.305262	36	4.0078	0.0237422	0.166371
GFRA1	NM_005264	chr10	-	117806433	118023116	chr10.118020722-118024220	-56.3599	0.00213827	0.305262	-1104	9.17039	0.00128042	0.0519189
PAX9	NM_006194	chr14	+	36196532	36216762	chr14.36200932-36202536	-41.4097	0.00216588	0.305262	4400	3.89241	0.00916669	0.122378
MYRIP	NM_015460	chr3	+	39826306	40276815	chr3.39826029-39826824	-62.4678	0.00222092	0.305262	-277	6.99099	0.000148625	0.0188279
RAPGEFL1	NM_016339	chr17	+	35587767	35605432	chr17.35587131-35588321	-47.1944	0.00223086	0.305262	-636	3.08523	0.00309029	0.0759235
SERPINE2	NM_006216	chr2	-	224548008	224612280	chr2.224611465-224612979	-5.556	0.00227217	0.305732	-699	-3.35002	0.0297135	0.178148
HS3ST1	NM_005114	chr4	-	11009085	11039635	chr4.11039333-11040354	18.7753	0.00229813	0.305732	-719	-4.4569	0.00218003	0.0642717
WASH1	NM_182905	chr9	-	4510	19739	chr9.18849-19588	-0.766667	0.00233788	0.307704	151	0.0840566	0.8277	0.60642
PRKCZ	NM_002744	chr1	+	1971768	2106694	chr1.1971111-1973072	-7.47681	0.00234507	0.307704	-657	0.96609	0.0319523	0.18146
KIFC2	NM_145754	chr8	+	145662545	145670307	chr8.145661413-145663313	-2.33848	0.00242335	0.315812	-1132	2.46658	0.00129632	0.0519189
CYHR1	NM_138496	chr8	-	145646122	145661226	chr8.145661413-145663313	-2.33848	0.00242335	0.315812	-2087	0.873917	0.139316	0.303714
RIN3	NM_024832	chr14	+	92049877	92225087	chr14.92049479-92050981	35.7692	0.00257999	0.324196	-398	-3.87505	0.0147546	0.143689
IGF2BP3	NM_006547	chr7	-	23316352	23476520	chr7.23474709-23476237	42.8533	0.00259836	0.324196	283	-7.03922	9.26e-05	0.0146237
MPPE1	NM_023075	chr18	-	11873471	11898641	chr18.11898222-11899082	-0.739378	0.00262307	0.324196	-441	0.549698	0.54467	0.516988
ADAMTS13	NR_024514	chr9	+	135269279	135314328	chr9.135272501-135273304	-6.4171	0.00277201	0.3278	3222	2.37068	0.00203008	0.0618761
REXO4	NM_020385	chr9	-	135261006	135272985	chr9.135272501-135273304	-6.4171	0.00277201	0.3278	-319	0.0860227	0.813467	0.602699
ADAMTS19	NM_133638	chr5	+	128824001	129102275	chr5.128823402-128825316	-47.7248	0.00290862	0.337701	-599	7.38647	0.000649586	0.041469
MNX1	NM_005515	chr7	-	156490307	156496108	chr7.156494931-156497175	-6.09111	0.00323708	0.358456	-1067	1.04914	0.160705	0.318659
FGF11	NM_004112	chr17	+	7283412	7288975	chr17.7280532-7281620	-15.6277	0.00335165	0.36348	-2880	-0.689486	0.532044	0.512822
TMEM102	NM_178518	chr17	+	7279485	7281722	chr17.7280532-7281620	-15.6277	0.00335165	0.36348	1047	0.327459	0.71033	0.572963
TMEM189	NM_001162505	chr20	-	48173680	48203742	chr20.48203352-48204116	-1.61886	0.00336843	0.36348	-374	0.230239	0.729713	0.578994
MAF	NM_005360	chr16	-	78185246	78192123	chr16.78190120-78193038	-22.2592	0.00343503	0.364981	-915	2.34331	0.25471	0.38522
VPS37D	NM_001077621	chr7	+	72720109	72724376	chr7.72719779-72720641	-1.57	0.00344841	0.364981	-330	3.05322	0.00054824	0.0389903
AR	NM_000044	chrX	+	66680598	66860844	chrX.66682762-66683004	-48.366	0.00351117	0.366241	2164	8.77768	3.59e-05	0.00985985
MRPL52	NM_181306	chr14	+	22368931	22374086	chr14.22368824-22369153	0.578214	0.00361116	0.367793	-107	-0.0092968	0.983461	0.646735
NKD2	NM_033120	chr5	+	1062167	1091925	chr5.1061715-1063039	-55.7538	0.0036474	0.367793	-452	6.92575	2.21e-05	0.00928316
CHST1	NM_003654	chr11	-	45627002	45643748	chr11.45642736-45644071	-41.6506	0.00374377	0.367793	-323	3.76045	0.00155076	0.0568074
PPARG	NM_005037	chr3	+	12304348	12450855	chr3.12304427-12305333	21.7561	0.00378247	0.36812	79	-5.38563	0.00326466	0.0783091
SAMD11	NM_152486	chr1	+	850983	869824	chr1.848833-851495	-7.33423	0.00401567	0.380466	-2150	4.09726	0.011528	0.132142
FAM131A	NM_144635	chr3	+	185540951	185546757	chr3.185539110-185539362	-1.87851	0.00403726	0.380466	-1841	0.844025	0.209449	0.356074
PANX2	NM_052839	chr22	+	48951286	48960851	chr22.48950334-48950787	-17.5147	0.00410377	0.380466	-952	-1.59402	0.149145	0.311849
ASCL2	NM_005170	chr11	-	2246303	2248758	chr11.2246680-2249508	-60.9655	0.00419631	0.382805	-750	6.05908	0.00325232	0.0782446
KCNH2	NM_000238	chr7	-	150272981	150305947	chr7.150305670-150305959	-44.196	0.00434435	0.394431	-12	3.09638	0.0991545	0.270373
NSUN5	NM_148956	chr7	-	72355161	72360759	chr7.72360263-72360903	-0.820427	0.00460796	0.40868	-144	0.663949	0.110373	0.280694
SDC3	NM_014654	chr1	-	31114899	31154067	chr1.31154125-31154553	-11.3609	0.00470532	0.411474	-486	-0.508847	0.468884	0.487568
RHBDL3	NM_138328	chr17	+	27617307	27675793	chr17.27617311-27618146	-4.45936	0.00471354	0.411474	4	0.6953	0.513988	0.505615
C16orf45	NM_033201	chr16	+	15435825	15589616	chr16.15435851-15436587	-25.8442	0.00475743	0.411474	26	1.91139	0.173853	0.328822
C1orf107	NM_014388	chr1	+	208067955	208097531	chr1.208067752-208068051	-0.840833	0.00476492	0.411474	-203	-0.631725	0.306987	0.415036
KIFC3	NM_005550	chr16	-	56349629	56393940	chr16.56393456-56394490	63.3929	0.00478981	0.411474	-550	-2.75932	0.0242608	0.167258
PGR	NM_000926	chr11	-	100405564	100505754	chr11.100503240-100504984	-52.9653	0.00498337	0.414252	770	12.0722	3.23e-05	0.00978914
SYNE1	NM_182961	chr6	-	152484514	153000227	chr6.152999503-153000165	-58.5196	0.00498869	0.414252	62	0.450243	0.716399	0.575189
PATZ1	NM_032050	chr22	-	30051789	30072249	chr22.30071045-30073718	-1.96868	0.00510588	0.414252	-1469	2.07722	0.00686057	0.108005
CREBBP	NM_001079846	chr16	-	3715056	3870122	chr16.3870649-3871652	-1.80322	0.00511017	0.414252	-1530	0.578661	0.23342	0.372551
LIN7B	NM_022165	chr19	+	54309429	54313529	chr19.54313835-54315447	-4.09642	0.00511069	0.414252	4406	0.456081	0.321543	0.423134
PPFIA3	NM_003660	chr19	+	54314474	54346092	chr19.54313835-54315447	-4.09642	0.00511069	0.414252	-639	1.77737	0.0500187	0.216398
CCNO	NM_021147	chr5	-	54562737	54565265	chr5.54563076-54563517	-71.9656	0.00513125	0.414252	1748	0.796825	0.469149	0.487648
MSN	NM_002444	chrX	+	64804235	64878518	chrX.64804274-64804562	63.0746	0.00519372	0.414252	39	-8.23475	0.000822805	0.0446216
C17orf28	NM_030630	chr17	-	70458433	70480495	chr17.70479762-70480759	-5.87828	0.00526075	0.414252	-264	3.21163	0.00199555	0.0617545
CACNA2D2	NM_001005505	chr3	-	50375234	50515896	chr3.50515224-50516127	-10.5666	0.00546246	0.419118	-231	3.30467	0.0128825	0.13857
PLAC8	NM_016619	chr4	-	84230234	84254935	chr4.84249654-84250333	3.50142	0.00547077	0.419118	4602	-4.11463	0.04733	0.211693
HS6ST3	NM_153456	chr13	+	95541093	96289813	chr13.95540139-95542163	-10.7403	0.00549357	0.419118	-954	5.85053	0.000110209	0.0156759
C9orf140	NM_178448	chr9	-	139076399	139084849	chr9.139083976-139085105	-2.91135	0.00550336	0.419118	-256	0.0842391	0.876279	0.620238
LMX1B	NM_002316	chr9	+	128416568	128503132	chr9.128412558-128417927	-20.3469	0.00555032	0.419118	-4010	3.12709	0.00607482	0.101562
DCHS1	NM_003737	chr11	-	6599133	6633650	chr11.6633072-6633672	-62.1716	0.00558754	0.419118	-22	-0.826788	0.493742	0.498199
ACN9	NM_020186	chr7	+	96583840	96649011	chr7.96584703-96585126	60.6253	0.00562265	0.419118	863	-6.33882	0.000117374	0.0164072
HYAL3	NM_003549	chr3	-	50305265	50311903	chr3.50311335-50311883	-3.2641	0.00570825	0.421948	20	-0.93652	0.0768634	0.2469
NAT6	NM_012191	chr3	-	50308836	50311716	chr3.50311335-50311883	-3.2641	0.00570825	0.421948	-167	-0.00135271	0.99755	0.648885
S1PR2	NM_004230	chr19	-	10193108	10202948	chr19.10201776-10203254	-3.93678	0.00577903	0.421948	-306	-0.473462	0.610868	0.54021
WNT10B	NM_003394	chr12	-	47645389	47651810	chr12.47649931-47650710	-32.2564	0.00585844	0.421948	1100	-0.873066	0.320534	0.422619
CIZ1	NM_012127	chr9	-	129968164	130006483	chr9.130005285-130006337	-9.32967	0.00597579	0.42243	146	-0.208834	0.724642	0.577915
DNM1	NM_004408	chr9	+	130005483	130057348	chr9.130005285-130006337	-9.32967	0.00597579	0.42243	-198	0.238539	0.839557	0.60927
SERTAD1	NM_013376	chr19	-	45620248	45623772	chr19.45618480-45619208	-0.838155	0.00601504	0.423261	4564	0.334455	0.414149	0.467134
PDXK	NM_003681	chr21	+	43963405	44006616	chr21.43962721-43964259	-10.9066	0.00604765	0.423261	-684	-0.742275	0.300417	0.410734
PIGS	NM_033198	chr17	-	23904532	23923014	chr17.23922232-23922908	-0.534617	0.00612484	0.425339	106	0.698635	0.18465	0.336796
CXCL12	NM_000609	chr10	-	44185610	44200548	chr10.44199720-44202397	-32.2669	0.00620176	0.427366	-1849	10.1689	8.84e-05	0.0146237
IGSF9B	NM_014987	chr11	-	133290394	133332090	chr11.133330547-133332667	-57.8426	0.00656491	0.441279	-577	7.07659	4.04e-05	0.0101583
C20orf134	NM_001024675	chr20	+	31717964	31719992	chr20.31718472-31719650	-63.8751	0.00676813	0.445	508	4.74231	0.000279155	0.0274622
ANKRD56	NM_001029870	chr4	-	78035105	78038026	chr4.78037039-78038624	-3.96569	0.00678724	0.445	-598	1.80565	0.125944	0.292578
ZNF446	NM_017908	chr19	+	63679606	63684409	chr19.63678665-63679861	-0.644518	0.00686944	0.445	-941	0.856705	0.062982	0.232727
C17orf76	NM_207387	chr17	-	16286052	16336205	chr17.16335558-16336568	-2.45538	0.00687579	0.445	-363	0.775651	0.451499	0.482873
GALNT12	NM_024642	chr9	+	100609801	100652180	chr9.100609726-100610170	-0.761186	0.00693741	0.447476	-75	0.621392	0.413845	0.467134
ADCY1	NM_021116	chr7	+	45580649	45729239	chr7.45579911-45582029	-61.8593	0.00702112	0.449846	-738	8.86725	0.00105528	0.0488902
EFHD1	NR_027663	chr2	+	233179010	233255734	chr2.233178890-233179321	-0.7509	0.00722811	0.456995	-120	3.12279	0.0517565	0.218799
PCP4L1	NM_001102566	chr1	+	159495140	159521864	chr1.159495101-159495652	-48.6588	0.007466	0.461094	-39	4.6743	0.0161074	0.145304
CABLES2	NM_031215	chr20	-	60397080	60415734	chr20.60415800-60416175	-2.25821	0.00747577	0.461094	-441	-0.0382329	0.940114	0.636868
PDZRN3	NM_015009	chr3	-	73514341	73756762	chr3.73755917-73757062	-60.5401	0.00787623	0.467723	-300	9.54736	2.38e-08	0.00019296
BTG2	NM_006763	chr1	+	201541286	201545352	chr1.201540946-201541961	-5.87252	0.00788089	0.467723	-340	3.06223	0.00868312	0.12034
OXTR	NM_000916	chr3	-	8767094	8786300	chr3.8783961-8786280	-47.9715	0.00788611	0.467723	20	-0.921641	0.516354	0.506886
WNT7B	NM_058238	chr22	-	44694913	44751672	chr22.44750210-44753898	-1.32684	0.00807008	0.471954	-2226	0.0898598	0.946302	0.638217
NRCAM	NM_005010	chr7	-	107575317	107884062	chr7.107882637-107884442	-32.2414	0.00823817	0.475359	-380	5.74145	0.0549376	0.223712
FIG4	NM_014845	chr6	+	110119116	110253327	chr6.110118282-110118497	-0.935833	0.00837178	0.475816	-834	-0.824087	0.257956	0.386865
PRKG1	NM_001098512	chr10	+	52420950	53725280	chr10.52420962-52421771	-48.0824	0.00839081	0.475816	12	4.82602	0.00607494	0.101562
FMNL2	NM_052905	chr2	+	152899996	153214594	chr2.152899738-152901220	13.8113	0.00839629	0.475816	-258	-2.65228	0.00485591	0.0946385
RND2	NM_005440	chr17	+	38430783	38437584	chr17.38430862-38431119	-32.9467	0.00850435	0.475816	79	4.81087	0.00491751	0.0951528
VAT1	NM_006373	chr17	-	38420147	38427985	chr17.38430862-38431119	-32.9467	0.00850435	0.475816	-3134	-0.706244	0.482136	0.493093
APBA1	NM_001163	chr9	-	71232268	71477095	chr9.71476624-71477901	-6.25143	0.0087923	0.482716	-806	-0.758985	0.593685	0.533892
C3orf57	NM_001040100	chr3	-	162545273	162572565	chr3.162572317-162573340	-64.163	0.00884265	0.482716	-775	8.95101	0.00417982	0.0862294
C21orf33	NM_004649	chr21	+	44377921	44390033	chr21.44377449-44378465	-3.29479	0.0089186	0.482716	-472	0.121275	0.800496	0.59849
KIF12	NM_138424	chr9	-	115893738	115901158	chr9.115900800-115901412	-50.4833	0.0089655	0.48381	-254	5.12028	0.00112623	0.0502313
GAL	NM_015973	chr11	+	68208558	68215219	chr11.68207935-68209422	-20.1256	0.0090911	0.487839	-623	-1.38674	0.295807	0.408289
NOVA1	NM_006489	chr14	-	25984928	26136800	chr14.26136153-26136418	-25.066	0.00915631	0.487881	382	7.05646	7.98e-05	0.0140649
IFT140	NM_014714	chr16	-	1500429	1602110	chr16.1600055-1605096	-3.12462	0.009195	0.487881	-2986	1.62352	0.00378127	0.0835196
CRAMP1L	NM_020825	chr16	+	1604641	1667908	chr16.1600055-1605096	-3.12462	0.009195	0.487881	-4586	0.563802	0.184217	0.336289
HERC1	NM_003922	chr15	-	61687869	61913200	chr15.61912567-61913718	-0.851935	0.00921921	0.487881	-518	0.248144	0.550184	0.519353
AK7	NM_152327	chr14	+	95928200	96024865	chr14.95927308-95927878	-0.938583	0.0093422	0.489868	-892	2.79979	0.143715	0.307355
TEC	NM_003215	chr4	-	47832556	47966571	chr4.47966783-47967055	0.647775	0.0094538	0.489868	-484	-1.80533	0.0014228	0.0551935
MEX3D	NM_203304	chr19	-	1505667	1519057	chr19.1517554-1519834	-1.91173	0.00956627	0.492639	-777	0.0205586	0.96251	0.642203
OTUB1	NM_017670	chr11	+	63509900	63522468	chr11.63509990-63511030	-5.35977	0.00972014	0.496558	90	0.895276	0.0809525	0.252015
DNAJA4	NM_018602	chr15	+	76343541	76361593	chr15.76343460-76344597	-49.9762	0.00975858	0.497196	-81	7.39359	5.53e-05	0.0121175
MED31	NM_016060	chr17	-	6487356	6495678	chr17.6498945-6499165	57.4718	0.00985401	0.500726	-3487	-0.738405	0.145012	0.308258
GABRD	NM_000815	chr1	+	1940627	1952052	chr1.1940271-1941339	-29.9735	0.00990947	0.500887	-356	3.28932	0.0610874	0.231672
DBNL	NM_001014436	chr7	+	44050763	44067840	chr7.44046242-44047093	-57.7719	0.0103219	0.51095	-4521	0.205243	0.564926	0.524768
RPS6KA2	NM_001006932	chr6	-	166742843	167195761	chr6.167195710-167196616	-32.5829	0.010565	0.514997	-855	-1.61667	0.118487	0.286873
GPR160	NM_014373	chr3	+	171238428	171285875	chr3.171238285-171239538	-8.40827	0.0107652	0.519405	-143	2.53245	0.0179524	0.150331
CCDC136	NM_022742	chr7	+	128219334	128249419	chr7.128217943-128219239	-10.1642	0.0111494	0.526084	-1391	-1.4695	0.040773	0.200467
C16orf72	NM_014117	chr16	+	9093037	9121056	chr16.9091647-9094190	-9.49453	0.011262	0.526178	-1390	0.652983	0.113037	0.282943
PUSL1	NM_153339	chr1	+	1233856	1236920	chr1.1232263-1235048	-2.49812	0.0114266	0.527469	-1593	-0.255274	0.607169	0.53873
NQO2	NM_000904	chr6	+	2945065	2964993	chr6.2945068-2945519	-0.941355	0.0114654	0.527988	3	-0.118312	0.865082	0.617024
TMEM47	NM_031442	chrX	-	34555101	34585326	chrX.34584428-34585648	-46.66	0.0115538	0.528252	-322	5.53089	0.000853437	0.0446525
CELSR1	NM_014246	chr22	-	45135394	45311731	chr22.45307981-45313525	-18.1717	0.0117833	0.536185	-1794	1.7262	0.00313401	0.0763038
ZNF469	NM_001127464	chr16	+	87021379	87034666	chr16.87025601-87026326	-15.4998	0.0118779	0.539209	4222	2.57365	0.401952	0.462328
CASKIN1	NM_020764	chr16	-	2167184	2186466	chr16.2185867-2187101	-10.2979	0.0119687	0.540767	-635	3.87154	0.00581295	0.100918
MNX1	NM_005515	chr7	-	156490307	156496108	chr7.156494179-156494393	-65.5917	0.0122537	0.545918	1715	1.04914	0.160705	0.318659
BARX2	NM_003658	chr11	+	128751090	128827384	chr11.128749208-128749777	-42.0743	0.0123806	0.548216	-1882	-0.0125783	0.993836	0.648446
PTGFRN	NM_020440	chr1	+	117254211	117334495	chr1.117253726-117254975	-1.91586	0.0123913	0.548216	-485	-0.839623	0.259041	0.38724
CGREF1	NM_006569	chr2	-	27176972	27195475	chr2.27195071-27195427	-64.846	0.0124925	0.548682	48	6.77934	3.77e-05	0.00985985
GPC1	NM_002081	chr2	+	241023787	241056168	chr2.241023083-241024993	-1.13239	0.012731	0.54991	-704	-0.548809	0.383886	0.454593
SKAP1	NM_001075099	chr17	-	43565800	43862593	chr17.43862343-43862777	-52.67	0.0128018	0.54991	-184	3.552	0.0611894	0.231672
ARID3C	NM_001017363	chr9	-	34611454	34618011	chr9.34618795-34619061	-1.30092	0.0128457	0.54991	-1050	2.13091	0.187579	0.339769
SEC31B	NM_015490	chr10	-	102236392	102269585	chr10.102269152-102269720	-5.7401	0.0129382	0.54991	-135	0.455307	0.663036	0.558388
GRHL1	NM_198182	chr2	+	10009242	10059862	chr2.10008358-10009907	-1.21467	0.0129557	0.54991	-884	0.733756	0.607752	0.538984
F2R	NM_001992	chr5	+	76047623	76067351	chr5.76046876-76048048	-25.7982	0.0129748	0.54991	-747	-1.22522	0.369074	0.446645
MPPED2	NM_001145399	chr11	-	30362615	30564506	chr11.30562580-30564704	-48.5206	0.0131489	0.553612	-198	7.07793	6.6e-05	0.0133775
GOLSYN	NM_001099744	chr8	-	110655580	110773196	chr8.110772585-110773073	-40.821	0.0132213	0.554224	123	0.34323	0.785169	0.594769
ST6GALNAC2	NM_006456	chr17	-	72073055	72093740	chr17.72092569-72093991	-3.1743	0.013474	0.555103	-251	2.54635	0.0112104	0.131533
RBM15	NM_022768	chr1	+	110683467	110690826	chr1.110681917-110682147	-2.22331	0.0137651	0.562257	-1550	-0.706946	0.0824011	0.253554
PLCB1	NM_015192	chr20	+	8061295	8813547	chr20.8060884-8061592	-43.9496	0.0139186	0.564556	-411	9.68136	6e-07	0.00091268
AARS2	NM_020745	chr6	-	44374440	44389041	chr6.44388697-44389176	-3.22696	0.0139982	0.564556	-135	-0.269403	0.569399	0.526249
DDX17	NM_006386	chr22	-	37209388	37232291	chr22.37231499-37232851	-9.73977	0.0144116	0.571074	-560	0.310818	0.504121	0.502051
ZNF784	NM_203374	chr19	-	60823918	60827753	chr19.60824851-60825678	-3.06042	0.0144579	0.571074	2075	0.736157	0.136964	0.302064
ARF5	NM_001662	chr7	+	127015752	127018988	chr7.127012436-127013186	-2.08081	0.0146859	0.575765	-3316	0.282787	0.557177	0.521933
GCC1	NM_024523	chr7	-	127007917	127012890	chr7.127012436-127013186	-2.08081	0.0146859	0.575765	-296	0.00699131	0.986152	0.646735
FOSL1	NM_005438	chr11	-	65416267	65424573	chr11.65423252-65424785	20.8233	0.0148737	0.57914	-212	-5.79728	0.00417315	0.0862294
ARFRP1	NM_003224	chr20	-	61800439	61809799	chr20.61809103-61810718	-3.93487	0.015132	0.58287	-919	0.211481	0.689222	0.56633
ZGPAT	NM_001083113	chr20	+	61809237	61837938	chr20.61809103-61810718	-3.93487	0.015132	0.58287	-134	0.521127	0.373581	0.448915
PTGER3	NM_198714	chr1	-	71090623	71286079	chr1.71284812-71286392	-54.4103	0.0151521	0.58287	-313	7.50792	0.00403109	0.0851103
ZNF502	NM_033210	chr3	+	44729138	44740325	chr3.44729103-44729403	53.8486	0.0154949	0.588831	-35	-6.04278	0.00056412	0.0394279
CACNA1H	NM_021098	chr16	+	1143241	1211773	chr16.1142415-1144625	-49.9339	0.0155222	0.588831	-826	9.00271	7.9e-05	0.0140649
GPR124	NM_032777	chr8	+	37773581	37820650	chr8.37773206-37775258	-14.9461	0.0157123	0.591359	-375	-0.342694	0.707498	0.572377
ADORA2B	NM_000676	chr17	+	15788955	15819935	chr17.15788482-15790238	21.0349	0.0162308	0.60611	-473	-5.8512	0.00625586	0.10351
TTLL3	NM_001025930	chr3	+	9826903	9853040	chr3.9826476-9827171	-1.28625	0.0165287	0.614838	-427	0.161719	0.791419	0.59675
CCDC146	NM_020879	chr7	+	76589869	76762457	chr7.76588931-76589330	-1.46271	0.0166628	0.61647	-938	0.706865	0.287681	0.403598
C6orf108	NM_006443	chr6	-	43301344	43305189	chr6.43304789-43305318	-1.55009	0.0166691	0.61647	-129	0.738038	0.101983	0.272076
SLC39A14	NM_001135154	chr8	+	22280706	22347583	chr8.22280464-22281189	-0.519041	0.016791	0.619178	-242	-1.24524	0.0304677	0.179283
ZNF691	NM_015911	chr1	+	43084866	43090733	chr1.43084845-43085100	-0.383548	0.016807	0.619178	-21	0.127493	0.758417	0.587794
PLXNA4	NM_020911	chr7	-	131458630	131911863	chr7.131911014-131913067	-48.974	0.016938	0.621613	-1204	1.19959	0.537553	0.514278
SGK1	NM_001143676	chr6	-	134532077	134680889	chr6.134680490-134680714	-62.5142	0.0171129	0.622741	175	-2.80288	0.0392472	0.197006
DUSP8	NM_004420	chr11	-	1531856	1549726	chr11.1549074-1549386	-45.7212	0.0171288	0.622741	340	1.32714	0.196209	0.346908
ATP8B3	NM_138813	chr19	-	1733073	1763270	chr19.1766700-1767784	-2.61871	0.017163	0.622741	-4514	-1.00068	0.354134	0.438213
SLC16A9	NM_194298	chr10	-	61080528	61139655	chr10.61138616-61140005	-21.8126	0.0173996	0.623309	-350	4.47823	0.0113647	0.132142
TMEM97	NM_014573	chr17	+	23670247	23679838	chr17.23669417-23669741	-58.2878	0.0174052	0.623309	-830	0.679664	0.110061	0.280362
MAPK8IP2	NM_012324	chr22	+	49385996	49396845	chr22.49385360-49386618	-8.56649	0.0175947	0.623546	-636	2.65644	0.0125692	0.13697
GNB2	NM_005273	chr7	+	100109298	100114727	chr7.100108811-100111939	-21.2374	0.017641	0.623546	-487	0.407668	0.389433	0.456671
AKR1B1	NM_001628	chr7	-	133777646	133794428	chr7.133793655-133794603	61.9014	0.0177337	0.623546	-175	-8.62129	0.00107987	0.0494638
MAST4	NM_198828	chr5	+	65927931	66318107	chr5.65927633-65929295	-0.951268	0.0177393	0.623546	-298	1.14933	0.127288	0.293569
INPP4B	NM_001101669	chr4	-	143168631	143987054	chr4.143986390-143987863	-47.743	0.0179162	0.626096	-809	1.26325	0.185764	0.337614
RBPMS	NM_001008710	chr8	+	30361485	30549276	chr8.30360958-30362420	-1.10202	0.0181866	0.630141	-527	1.28985	0.165684	0.322519
FBXO3	NM_012175	chr11	-	33719065	33752647	chr11.33751968-33752895	-0.881603	0.0183442	0.630141	-248	-0.450118	0.417764	0.468037
SRRM2	NM_016333	chr16	+	2742330	2761414	chr16.2746312-2746580	-46.5188	0.0183706	0.630141	3982	0.659168	0.0825248	0.253554
PPOX	NM_000309	chr1	+	159402804	159407634	chr1.159402625-159403310	-1.18444	0.0183853	0.630141	-179	0.673726	0.1569	0.316094
CATSPER2	NM_172095	chr15	-	41710063	41728331	chr15.41728158-41728994	-3.53597	0.018417	0.630141	-663	-0.243316	0.688161	0.566197
SLC16A6	NM_004694	chr17	-	63775932	63799000	chr17.63798136-63800127	-0.795687	0.0184203	0.630141	-1127	3.10465	0.000610425	0.0410486
EGFR	NM_005228	chr7	+	55054218	55242525	chr7.55053635-55055599	24.7753	0.018493	0.630151	-583	-5.48302	0.000685194	0.0424065
TUBB3	NM_006086	chr16	+	88517245	88530006	chr16.88519636-88520461	-1.92394	0.0184976	0.630151	2391	1.1712	0.324064	0.42466
EPHB2	NM_017449	chr1	+	22909917	23114410	chr1.22909410-22910949	1.88951	0.0185395	0.630151	-507	-3.2701	0.00765171	0.113413
SLC1A2	NM_004171	chr11	-	35229327	35397681	chr11.35396951-35398458	-16.5896	0.0187576	0.631283	-777	4.74052	0.0144153	0.14298
FAM43A	NM_153690	chr3	+	195887910	195891055	chr3.195887726-195890331	-6.26731	0.0187699	0.631283	-184	0.0965883	0.900452	0.626348
HLTF	NM_003071	chr3	-	150230593	150287031	chr3.150286591-150287244	-5.80401	0.0188195	0.631283	-213	0.496472	0.393126	0.458068
NAV1	NM_020443	chr1	+	199884072	200062720	chr1.199883664-199886411	-52.283	0.0190387	0.63307	-408	-4.14832	0.00767753	0.113588
DSCAML1	NM_020693	chr11	-	116803698	117173186	chr11.117171844-117173351	-35.1773	0.0190859	0.63307	-165	4.42163	0.0151423	0.143964
ASAM	NM_024769	chr11	-	122448242	122571217	chr11.122571727-122572196	-8.25071	0.0191008	0.63307	-979	-1.37298	0.342455	0.432002
KLF11	NM_003597	chr2	+	10101132	10112414	chr2.10100086-10102153	10.9009	0.0194491	0.641486	-1046	-1.05312	0.0690842	0.239027
VLDLR	NM_003383	chr9	+	2611792	2644485	chr9.2611308-2613685	5.9856	0.0195518	0.643163	-484	-2.71229	0.00185388	0.0603634
DOC2A	NM_003586	chr16	-	29924335	29929902	chr16.29930152-29930508	-18.2294	0.0198807	0.646812	-606	1.37423	0.352725	0.437337
PCMTD2	NM_001104925	chr20	+	62357491	62378023	chr20.62357132-62357907	-0.502597	0.0202637	0.652905	-359	0.957028	0.0581305	0.229204
FKBP4	NM_002014	chr12	+	2774368	2784846	chr12.2773650-2775450	-10.7271	0.020435	0.653545	-718	1.99679	0.0059542	0.101562
RAB3A	NM_002866	chr19	-	18168610	18175874	chr19.18174908-18176129	-18.6123	0.0205316	0.654452	-255	1.58483	0.0545531	0.223666
SRMS	NM_080823	chr20	-	61642606	61649301	chr20.61648886-61649627	-10.2506	0.0207585	0.656305	-326	3.71434	0.0230053	0.165206
CADM1	NM_014333	chr11	-	114549554	114880451	chr11.114878784-114881091	-35.8308	0.0207611	0.656305	-640	10.0691	1.09e-05	0.00729681
SEC23B	NM_006363	chr20	+	18436187	18490050	chr20.18433170-18433580	-37.5261	0.0210463	0.65779	-3017	0.586877	0.100557	0.271696
CUX2	NM_015267	chr12	+	109956211	110272739	chr12.109955444-109955961	-53.0005	0.0211331	0.658053	-767	4.61292	0.000943864	0.0471915
PSTPIP2	NM_024430	chr18	-	41817499	41906248	chr18.41905794-41906453	-8.87683	0.0211627	0.658053	-205	2.76139	0.0230032	0.165206
CPLX1	NM_006651	chr4	-	768744	809945	chr4.808646-810970	-20.2738	0.0212973	0.658053	-1025	3.27586	0.0128778	0.13857
CORO2B	NM_006091	chr15	+	66658626	66807198	chr15.66657687-66659028	1.94521	0.0213395	0.658297	-939	-3.55461	0.0546756	0.223666
ANAPC2	NM_013366	chr9	-	139189056	139202878	chr9.139199150-139199585	-1.46274	0.0213791	0.658459	3293	0.455259	0.421265	0.469685
SSNA1	NM_003731	chr9	+	139202874	139204643	chr9.139199150-139199585	-1.46274	0.0213791	0.658459	-3724	0.270097	0.628225	0.545797
CD68	NM_001251	chr17	+	7423528	7426153	chr17.7427009-7428155	-56.3087	0.0214515	0.658569	3481	-1.84727	0.164522	0.321755
MPDU1	NM_004870	chr17	+	7427688	7432249	chr17.7427009-7428155	-56.3087	0.0214515	0.658569	-679	0.400729	0.450318	0.482524
MMP17	NM_016155	chr12	+	130878893	130902269	chr12.130878392-130881692	-17.418	0.0216288	0.659636	-501	3.96946	0.000131479	0.0171931
ALKBH5	NM_017758	chr17	+	18027591	18053992	chr17.18026983-18029085	-0.766776	0.0218183	0.659636	-608	-0.0980062	0.818188	0.604035
ZNF134	NM_003435	chr19	+	62817641	62825448	chr19.62817342-62817714	-0.50885	0.0218332	0.659636	-299	0.201314	0.669926	0.560465
ANKLE2	NM_015114	chr12	-	131812326	131848524	chr12.131845560-131845924	-9.57266	0.0218886	0.659636	2600	0.581141	0.120136	0.288551
C9orf116	NM_144654	chr9	-	137526846	137531582	chr9.137531215-137533092	-0.660022	0.0219192	0.659636	-1510	0.925518	0.274122	0.39602
MRPS2	NM_016034	chr9	+	137532303	137536340	chr9.137531215-137533092	-0.660022	0.0219192	0.659636	-1088	-0.463969	0.327241	0.42567
RTN4RL2	NM_178570	chr11	+	56984914	57000960	chr11.56983342-56985283	-7.78548	0.0221261	0.659801	-1572	-0.659469	0.220173	0.364821
ATP8B2	NM_020452	chr1	+	152566899	152590403	chr1.152564829-152565168	-27.2574	0.0222102	0.659801	-2070	3.31807	0.0207873	0.161133
CHTF18	NM_022092	chr16	+	778622	788075	chr16.777377-779342	-3.14317	0.0222114	0.659801	-1245	0.384209	0.397597	0.460112
RPUSD1	NM_058192	chr16	-	774974	778384	chr16.777377-779342	-3.14317	0.0222114	0.659801	-958	0.432577	0.41851	0.468596
C9orf9	NM_018956	chr9	+	134744110	134755239	chr9.134743168-134744205	-1.3267	0.0223664	0.661629	-942	-0.307394	0.620877	0.542766
C9orf98	NM_152572	chr9	-	134590785	134744019	chr9.134743168-134744205	-1.3267	0.0223664	0.661629	-186	0.941266	0.272047	0.394462
ZC3H18	NM_144604	chr16	+	87164289	87225872	chr16.87163677-87164834	-1.13969	0.0224153	0.661629	-612	0.0147876	0.971766	0.643664
IRF5	NM_001098629	chr7	+	128365229	128377324	chr7.128365054-128365992	-3.53196	0.0224429	0.661629	-175	0.143509	0.823055	0.605313
CILP2	NM_153221	chr19	+	19510073	19518468	chr19.19511683-19512274	-4.56858	0.0226195	0.664607	1610	-0.0756359	0.947932	0.638271
LYSMD2	NM_001143917	chr15	-	49802553	49830942	chr15.49830714-49831739	-1.08549	0.0227567	0.66558	-797	-0.803669	0.218804	0.363121
TMOD2	NM_014548	chr15	+	49831049	49895848	chr15.49830714-49831739	-1.08549	0.0227567	0.66558	-335	0.895588	0.323249	0.424375
SLITRK4	NM_173078	chrX	-	142543607	142550685	chrX.142549076-142550624	-50.0194	0.0227569	0.66558	61	6.7383	0.00110653	0.0498402
ZFP41	NM_173832	chr8	+	144400483	144416250	chr8.144403740-144404118	-2.43196	0.0228636	0.666666	3257	0.486443	0.355669	0.439039
RIMS1	NM_014989	chr6	+	72653370	73169229	chr6.72652757-72653125	-52.7667	0.023035	0.669624	-613	1.93494	0.190708	0.343138
HES6	NM_018645	chr2	-	238811648	238813420	chr2.238812331-238814639	-19.4338	0.0231045	0.670629	-1219	0.802408	0.276181	0.397719
SEMA7A	NM_003612	chr15	-	72488683	72513352	chr15.72512376-72513540	9.73728	0.0232281	0.671166	-188	-2.81752	0.00882728	0.121507
GEFT	NM_001111270	chr12	+	56290229	56297293	chr12.56291249-56291618	-19.705	0.0232674	0.671286	1020	1.353	0.180775	0.333533
B3GNT1	NM_006876	chr11	-	65869418	65871737	chr11.65871073-65872101	-1.12377	0.0233663	0.671766	-364	0.537465	0.479734	0.492027
BRMS1	NM_015399	chr11	-	65861379	65869158	chr11.65871073-65872101	-1.12377	0.0233663	0.671766	-2943	0.516266	0.168642	0.325641
FASN	NM_004104	chr17	-	77629502	77649395	chr17.77647460-77647681	-59.3434	0.0234978	0.671955	1714	0.864872	0.210136	0.356719
AR	NM_000044	chrX	+	66680598	66860844	chrX.66680409-66680802	-35.6408	0.0235361	0.671955	-189	8.77768	3.59e-05	0.00985985
HYAL2	NM_003773	chr3	-	50330231	50335285	chr3.50332457-50332687	-14.2917	0.0236524	0.67297	2598	-0.0418991	0.920685	0.631946
C1QTNF1	NM_198594	chr17	+	74531845	74557465	chr17.74531618-74532463	-61.0031	0.0236959	0.67297	-227	-3.20488	0.00584516	0.101045
RNF40	NM_014771	chr16	+	30681130	30694039	chr16.30680031-30681504	-5.52204	0.0237824	0.67297	-1099	0.909601	0.0423743	0.202356
ARHGEF10L	NM_018125	chr1	+	17738916	17896957	chr1.17738450-17739217	-1.32705	0.0238424	0.673012	-466	0.773411	0.0701508	0.240224
KLHDC9	NM_152366	chr1	+	159334777	159336760	chr1.159334686-159335425	-39.5152	0.0238893	0.673012	-91	3.25695	0.00654344	0.105971
IGF2BP2	NM_001007225	chr3	-	186844220	187025521	chr3.187023739-187026837	25.5635	0.0241108	0.674683	-1316	-4.37626	0.00230283	0.0652983
BACE1	NM_138971	chr11	-	116661624	116692182	chr11.116691554-116692189	-6.48419	0.0241549	0.674683	-7	0.81713	0.29556	0.408289
C16orf14	NM_138418	chr16	+	631849	638475	chr16.631598-632701	-0.61828	0.0242275	0.674683	-251	0.831598	0.0458696	0.208915
NPTXR	NM_014293	chr22	-	37544402	37569963	chr22.37569114-37570371	-10.9399	0.0244473	0.678351	-408	1.51593	0.00537959	0.0987412
LARP6	NM_018357	chr15	-	68910942	68933552	chr15.68933049-68933874	7.28287	0.0245795	0.678664	-322	-1.50617	0.0892742	0.259425
CYP1A1	NM_000499	chr15	-	72798935	72804930	chr15.72805239-72806389	-4.60758	0.0247124	0.678664	-1459	-0.235964	0.723853	0.577672
CAMK2N2	NM_033259	chr3	-	185459696	185461945	chr3.185460239-185463324	-23.2613	0.0247207	0.678664	-1379	-1.26725	0.220696	0.364961
GATAD2A	NM_017660	chr19	+	19357641	19480741	chr19.19356952-19358038	-0.903589	0.0247824	0.678664	-689	-0.702649	0.155937	0.31582
LMTK3	NM_001080434	chr19	-	53680339	53708258	chr19.53708549-53709019	-1.07109	0.0247984	0.678664	-761	1.18722	0.468305	0.487364
EGFLAM	NM_152403	chr5	+	38294289	38500407	chr5.38293582-38294893	-26.2816	0.0249172	0.680942	-707	-4.72523	0.0163601	0.145519
NDRG2	NM_201537	chr14	-	20554761	20563775	chr14.20562575-20564110	-17.8076	0.0251679	0.683338	-335	1.5128	0.148073	0.311497
FZD5	NM_003468	chr2	-	208335554	208342388	chr2.208339803-208343179	17.2513	0.025301	0.683683	-791	-1.46031	0.0598527	0.230528
GINS2	NM_016095	chr16	-	84268781	84280089	chr16.84279710-84280442	-3.60999	0.0253648	0.684186	-353	0.153748	0.847491	0.611232
STMN3	NM_015894	chr20	-	61741504	61755224	chr20.61753960-61755279	-30.3785	0.0253932	0.684186	-55	1.55934	0.36485	0.444551
FASN	NM_004104	chr17	-	77629502	77649395	chr17.77648468-77650565	-3.56474	0.0256126	0.686334	-1170	0.864872	0.210136	0.356719
ATP8B2	NM_020452	chr1	+	152566899	152590403	chr1.152567599-152568152	-8.28192	0.0257112	0.686334	700	3.31807	0.0207873	0.161133
FASN	NM_004104	chr17	-	77629502	77649395	chr17.77651954-77652173	-50.5896	0.0257359	0.686334	-2778	0.864872	0.210136	0.356719
FAM53B	NM_014661	chr10	-	126297852	126422920	chr10.126421304-126423275	-0.493263	0.0257397	0.686334	-355	0.574062	0.244015	0.379798
RHOT2	NM_138769	chr16	+	658133	664172	chr16.657932-659065	-4.51916	0.0257952	0.686334	-201	1.05212	0.0356203	0.188926
MRPL20	NM_017971	chr1	-	1327138	1332556	chr1.1331867-1332815	-3.21068	0.0265618	0.697856	-259	0.439	0.224282	0.366957
RASSF2	NM_014737	chr20	-	4708669	4752291	chr20.4751013-4752146	-25.1586	0.0270109	0.699356	145	-2.51358	0.120355	0.288865
STMN1	NM_001145454	chr1	-	26083264	26105580	chr1.26104537-26106211	-2.05597	0.0270147	0.699356	-631	-0.502463	0.404871	0.46328
ZBTB45	NM_032792	chr19	-	63716708	63722733	chr19.63720164-63720751	-2.72791	0.0271217	0.700231	1982	0.393158	0.358009	0.44078
AKAP10	NM_007202	chr17	-	19749341	19821721	chr17.19821268-19822225	-2.93844	0.0272005	0.700656	-504	-0.172716	0.741673	0.582874
LASS1	NM_021267	chr19	-	18840360	18867953	chr19.18867031-18868546	-22.8774	0.0272113	0.700656	-593	0.616391	0.349295	0.435749
RHBG	NM_020407	chr1	+	154605626	154621633	chr1.154605382-154605875	-1.79888	0.0273019	0.700798	-244	3.51375	0.000662629	0.0416458
SLC30A3	NM_003459	chr2	-	27330943	27339464	chr2.27338377-27341693	-20.4348	0.0273472	0.700798	-2229	-0.468874	0.595656	0.534046
NFIC	NM_205843	chr19	+	3310615	3414603	chr19.3309495-3312248	-5.14932	0.0277657	0.701687	-1120	-0.222319	0.639801	0.550093
RASSF1	NM_007182	chr3	-	50342220	50353371	chr3.50357893-50358314	-29.6835	0.0279802	0.701687	-4943	-0.757668	0.154526	0.314624
ZMYND10	NM_015896	chr3	-	50353540	50358160	chr3.50357893-50358314	-29.6835	0.0279802	0.701687	-154	1.47478	0.286391	0.403308
MEX3B	NM_032246	chr15	-	80121182	80125416	chr15.80122527-80126992	-3.15695	0.0281174	0.701687	-1576	1.73924	0.323771	0.424482
ZNF200	NM_198087	chr16	-	3212325	3225458	chr16.3224640-3225512	-1.15805	0.0282895	0.701687	-54	0.219921	0.683957	0.564917
SLC25A22	NM_024698	chr11	-	780474	786221	chr11.781953-782400	2.40168	0.0284569	0.701687	3821	-1.10616	0.0777216	0.247443
NPNT	NM_001033047	chr4	+	107036053	107112277	chr4.107035864-107037218	-13.2758	0.028527	0.701687	-189	5.90583	0.0234862	0.166189
TNK1	NM_003985	chr17	+	7225088	7233816	chr17.7224947-7225411	-3.01595	0.0285508	0.701687	-141	0.472969	0.407693	0.464567
SNX9	NM_016224	chr6	+	158164281	158286097	chr6.158163589-158165023	-10.2271	0.0285596	0.701687	-692	-0.931021	0.0569214	0.227537
ADAMTS15	NM_139055	chr11	+	129824078	129848926	chr11.129823444-129825408	-28.7055	0.0285629	0.701687	-634	1.07086	0.664116	0.558856
LHX2	NM_004789	chr9	+	125813709	125835263	chr9.125813067-125820774	-12.2918	0.028594	0.701687	-642	0.81947	0.551144	0.519589
IRS1	NM_005544	chr2	-	227304276	227371750	chr2.227370326-227373156	-31.5295	0.0286011	0.701687	-1406	2.34152	0.153241	0.31405
LMTK3	NM_001080434	chr19	-	53680339	53708258	chr19.53706423-53706752	-48.5503	0.0288162	0.702332	1506	1.18722	0.468305	0.487364
GAD1	NM_000817	chr2	+	171381445	171425905	chr2.171379844-171380050	-16.9716	0.0291434	0.703853	-1601	-1.89599	0.197005	0.347192
PHF11	NM_001040443	chr13	+	48967801	49001118	chr13.48968023-48968720	-7.37464	0.0291932	0.703853	222	-0.644717	0.250211	0.38319
NTRK2	NM_001018064	chr9	+	86473285	86828325	chr9.86472998-86475524	-35.2894	0.0292458	0.703853	-287	0.031492	0.971305	0.643664
RCCD1	NM_033544	chr15	+	89299109	89307359	chr15.89300956-89301822	-34.3943	0.0292827	0.703853	1847	-0.102479	0.869713	0.618407
PSMB3	NM_002795	chr17	+	34162527	34174004	chr17.34162188-34163103	-1.3828	0.0295351	0.708173	-339	0.674825	0.476895	0.49154
TPRG1L	NM_182752	chr1	+	3531415	3536554	chr1.3530627-3532101	-1.38597	0.0295757	0.708173	-788	0.094764	0.794498	0.597537
OBSCN	NM_001098623	chr1	+	226462483	226633198	chr1.226466094-226468660	-9.21184	0.0295787	0.708173	3611	-0.755009	0.331194	0.427288
C18orf1	NM_181481	chr18	+	13208785	13642753	chr18.13207073-13209044	-15.9289	0.0297111	0.708814	-1712	1.16943	0.26959	0.392621
PTPN18	NM_001142370	chr2	+	130830049	130849451	chr2.130829560-130830747	-1.95964	0.0298404	0.709249	-489	0.0282073	0.943979	0.637781
ZNF236	NM_007345	chr18	+	72665103	72811670	chr18.72662797-72664893	-5.82677	0.0301465	0.712985	-2306	0.683597	0.124546	0.291418
GJD3	NM_152219	chr17	-	35770430	35774471	chr17.35772491-35773790	-1.18879	0.0303028	0.71316	681	1.36775	0.0405047	0.199609
PRR5	NM_001017528	chr22	+	43443256	43512225	chr22.43442823-43443756	-44.7925	0.0305471	0.71544	-433	0.523854	0.43925	0.476204
UCK1	NM_001135954	chr9	-	133389004	133396483	chr9.133395846-133396994	-9.78937	0.0306388	0.71544	-511	0.49765	0.254309	0.385172
SLC38A9	NM_173514	chr5	-	54957432	55043920	chr5.55043593-55044125	-0.802177	0.0306611	0.71544	-205	0.425971	0.551078	0.519589
EHD3	NM_014600	chr2	+	31310383	31344763	chr2.31310244-31311157	-28.1748	0.0309885	0.719176	-139	0.372596	0.557289	0.521933
PIN1	NM_006221	chr19	+	9806998	9821358	chr19.9806505-9807389	-0.827219	0.0311188	0.719176	-493	-0.644194	0.237403	0.37549
NAAA	NM_001042402	chr4	-	77050831	77081190	chr4.77080113-77081450	-4.8546	0.0311629	0.719176	-260	2.03449	0.0370565	0.191728
SLC19A3	NM_025243	chr2	-	228258169	228290989	chr2.228290729-228291065	31.7483	0.0311665	0.719176	-76	-2.38736	0.00245115	0.0673656
GPR68	NM_003485	chr14	-	90768628	90789977	chr14.90789329-90789981	-6.63544	0.0314202	0.721725	-4	3.56748	0.116622	0.286088
PDGFRL	NM_006207	chr8	+	17478985	17544903	chr8.17478933-17479239	-0.897178	0.0315565	0.721813	-52	2.93761	0.074074	0.243853
CCNG1	NM_004060	chr5	+	162797154	162804600	chr5.162796962-162797585	0.553854	0.0315949	0.721813	-192	0.399245	0.590972	0.533354
ZNF396	NM_145756	chr18	-	31200658	31211299	chr18.31210762-31211404	-3.18212	0.0316242	0.721813	-105	3.53532	0.00383719	0.0838553
TRPV4	NM_021625	chr12	-	108705276	108755595	chr12.108755426-108755965	-35.2452	0.0316421	0.721813	-370	3.461	0.0286217	0.176619
IL17RA	NM_014339	chr22	+	15945848	15971389	chr22.15945517-15946990	-11.066	0.0317255	0.721813	-331	0.213104	0.678265	0.563715
AHSA2	NM_152392	chr2	+	61258324	61267562	chr2.61257552-61258865	-7.36184	0.0318239	0.722962	-772	0.409766	0.385887	0.455316
PRUNE2	NM_015225	chr9	-	78416111	78710823	chr9.78710623-78711328	-58.6903	0.0319796	0.723301	-505	4.87339	0.00785752	0.114578
PACS2	NM_001100913	chr14	+	104852125	104935529	chr14.104851384-104853072	-1.67607	0.0321103	0.724545	-741	1.07628	0.0669903	0.236922
ATP5D	NM_001687	chr19	+	1192748	1195824	chr19.1187946-1189311	-3.71245	0.0323548	0.727039	-4802	0.142464	0.811222	0.602237
C19orf26	NM_152769	chr19	-	1180946	1188990	chr19.1187946-1189311	-3.71245	0.0323548	0.727039	-321	0.646625	0.289006	0.404686
ATP5D	NM_001687	chr19	+	1192748	1195824	chr19.1192619-1193569	-4.37971	0.0323642	0.727039	-129	0.142464	0.811222	0.602237
C19orf26	NM_152769	chr19	-	1180946	1188990	chr19.1192619-1193569	-4.37971	0.0323642	0.727039	-4579	0.646625	0.289006	0.404686
TNFRSF12A	NM_016639	chr16	+	3010313	3012384	chr16.3007522-3008359	-4.23289	0.0324635	0.727039	-2791	-0.959725	0.0627569	0.232727
GDF15	NM_004864	chr19	+	18357967	18360986	chr19.18358063-18358269	-46.4943	0.0325244	0.727039	96	0.543976	0.793862	0.597446
MFSD4	NM_181644	chr1	+	203804734	203838669	chr1.203804374-203805066	-16.9743	0.0326998	0.72841	-360	1.89813	0.116711	0.286116
SPNS1	NM_032038	chr16	+	28893596	28903369	chr16.28893382-28894162	-1.49205	0.0330252	0.731565	-214	1.10331	0.0376315	0.19279
FGFR4	NM_213647	chr5	+	176446526	176457732	chr5.176446492-176447039	-8.719	0.0335016	0.736845	-34	2.49505	0.0419271	0.201552
FAM155B	NM_015686	chrX	+	68641802	68669076	chrX.68640456-68642776	-24.067	0.0338081	0.738499	-1346	3.14267	0.17535	0.329852
CPSF3L	NM_017871	chr1	-	1236827	1249909	chr1.1249506-1250498	-1.93734	0.0341848	0.742494	-589	-0.329515	0.426532	0.47223
GLTPD1	NM_001029885	chr1	+	1250005	1254139	chr1.1249506-1250498	-1.93734	0.0341848	0.742494	-499	-0.430653	0.267767	0.391792
DLX2	NM_004405	chr2	-	172672411	172675724	chr2.172673008-172676103	-15.7239	0.0343205	0.743248	-379	0.87332	0.406619	0.464086
SYNGR3	NM_004209	chr16	+	1979968	1984277	chr16.1980035-1980629	-15.1339	0.0345413	0.743248	67	1.87538	0.270501	0.393311
MUC6	NM_005961	chr11	-	1002823	1026706	chr11.1026420-1026827	-46.0879	0.0345611	0.743248	-121	2.759	0.273889	0.395895
SIDT2	NM_001040455	chr11	+	116555148	116573371	chr11.116554609-116555444	-0.367117	0.0348173	0.744175	-539	1.42767	0.0194871	0.156785
ALDH1A3	NM_000693	chr15	+	99237531	99274353	chr15.99236784-99238656	24.9732	0.0348967	0.744175	-747	-3.70449	0.0309317	0.179671
SYCP2	NM_014258	chr20	-	57872012	57940604	chr20.57941150-57942912	-46.2682	0.0351136	0.744175	-2308	3.92225	0.00739305	0.112201
MAPK8IP1	NM_005456	chr11	+	45863777	45884592	chr11.45863582-45864385	-13.9025	0.0353523	0.744175	-195	1.70198	0.0928785	0.263306
PDPR	NM_017990	chr16	+	68705029	68752685	chr16.68705167-68706260	-2.71806	0.0353581	0.744175	138	0.197116	0.757777	0.587523
GPR158	NM_020752	chr10	+	25504295	25931163	chr10.25503762-25505645	-32.767	0.0354479	0.744175	-533	-1.89313	0.246377	0.380991
MPV17L	NM_173803	chr16	+	15397111	15411044	chr16.15397027-15397576	-59.8091	0.0355453	0.744175	-84	4.89065	0.0188874	0.153746
PPYR1	NM_005972	chr10	+	46503539	46508326	chr10.46503347-46503639	-50.0043	0.0357221	0.744175	-192	-3.12898	0.00215917	0.0641231
YTHDC2	NM_022828	chr5	+	112877308	112958880	chr5.112877164-112877881	-0.374006	0.0357913	0.744175	-144	-0.241762	0.611883	0.540637
PPAP2C	NM_177526	chr19	-	232043	242435	chr19.246114-246354	-65.873	0.0358568	0.744175	-3919	-0.504375	0.290648	0.405795
SHROOM1	NM_133456	chr5	-	132185910	132189901	chr5.132186441-132187102	-2.12699	0.0359685	0.744175	2799	-1.43159	0.0255829	0.169123
ORAI2	NM_032831	chr7	+	101861000	101884273	chr7.101860610-101861339	-8.38885	0.0360879	0.744175	-390	1.00639	0.324415	0.424663
C14orf21	NM_174913	chr14	+	23838937	23844214	chr14.23838460-23839204	-0.378112	0.0361502	0.744373	-477	0.74146	0.218238	0.362895
DHRS1	NM_001136050	chr14	-	23829645	23838879	chr14.23838460-23839204	-0.378112	0.0361502	0.744373	-325	0.110009	0.7668	0.589556
PMPCA	NM_015160	chr9	+	138424936	138438034	chr9.138424288-138425616	-0.529617	0.0361943	0.744373	-648	0.492949	0.198939	0.348286
SDCCAG3	NM_006643	chr9	-	138416194	138424875	chr9.138424288-138425616	-0.529617	0.0361943	0.744373	-741	-0.459685	0.20694	0.353745
TMEM51	NM_001136217	chr1	+	15351614	15419560	chr1.15351806-15354058	5.55039	0.0364731	0.744373	192	-1.37789	0.120009	0.288376
DCDC2	NM_016356	chr6	-	24279961	24466259	chr6.24465698-24466288	-31.346	0.0364851	0.744373	-29	3.62177	0.0634952	0.232727
LYN	NM_001111097	chr8	+	56954939	57086494	chr8.56954669-56955879	25.3822	0.036586	0.744373	-270	-2.66537	0.011813	0.132838
SEPT5	NM_002688	chr22	+	18081986	18092297	chr22.18082268-18082469	-0.691239	0.0367346	0.745474	282	3.39928	0.00012668	0.0171213
C9orf72	NM_018325	chr9	-	27536543	27563481	chr9.27562966-27563385	-0.455335	0.0369911	0.746076	96	0.00942668	0.988732	0.647125
GRAMD2	NM_001012642	chr15	-	70239201	70277190	chr15.70276532-70277173	56.2981	0.0369978	0.746076	17	-1.57188	0.506326	0.503072
NRL	NM_006177	chr14	-	23619155	23623672	chr14.23620157-23620988	-11.0837	0.0372819	0.748123	2684	0.142109	0.829379	0.606444
DOCK6	NM_020812	chr19	-	11170970	11234157	chr19.11233679-11234126	-0.666544	0.0372947	0.748123	31	0.745654	0.441298	0.477429
TUBGCP2	NM_006659	chr10	-	134943127	134972634	chr10.134973228-134973438	-46.612	0.0373419	0.748285	-804	0.154985	0.819032	0.604189
ZNF511	NM_145806	chr10	+	134972412	134976656	chr10.134973228-134973438	-46.612	0.0373419	0.748285	816	-0.319416	0.670026	0.560481
NHS	NM_198270	chrX	+	17303463	17664034	chrX.17303080-17305738	15.5767	0.0374636	0.749104	-383	-2.53423	0.205247	0.352791
ZNF512B	NM_020713	chr20	-	62058498	62071662	chr20.62071097-62072120	-8.79855	0.0374893	0.749104	-458	1.24888	0.0427555	0.202886
CAMSAP1	NM_015447	chr9	-	137840153	137938826	chr9.137938283-137940146	-2.90409	0.0375771	0.749104	-1320	-0.137502	0.710076	0.572963
CFD	NM_001928	chr19	+	810664	814610	chr19.811517-813123	-21.7352	0.0376174	0.749104	853	1.39492	0.24006	0.37741
CAMK2B	NM_172078	chr7	-	44223273	44331755	chr7.44330957-44331853	-22.4298	0.0381054	0.750229	-98	4.36396	0.0145412	0.143423
B3GNT5	NM_032047	chr3	+	184453725	184473873	chr3.184454120-184455326	46.5677	0.0381843	0.750229	395	-3.68026	0.0888196	0.258666
BAI2	NM_001703	chr1	-	31965304	32002235	chr1.32000934-32002839	-9.00167	0.0382951	0.750229	-604	1.21821	0.180164	0.333188
SLC29A4	NM_153247	chr7	+	5289086	5310230	chr7.5289206-5289719	-5.02108	0.0383623	0.750229	120	1.31774	0.0465448	0.210114
GNG13	NM_016541	chr16	-	788041	790734	chr16.790228-790807	-24.4721	0.0384717	0.750229	-73	1.64976	0.0722626	0.242248
CXXC5	NM_016463	chr5	+	139008484	139042864	chr5.139007627-139010403	-4.80794	0.0384836	0.750229	-857	1.64724	0.0168906	0.146522
AMZ2	NM_001033569	chr17	+	63755739	63764900	chr17.63755178-63755998	-0.82114	0.0385705	0.750229	-561	1.02939	0.0197886	0.1576
GABARAP	NM_007278	chr17	-	7084461	7086477	chr17.7086203-7087433	-1.05529	0.0386455	0.750229	-956	0.182375	0.677061	0.563347
PHF23	NM_024297	chr17	-	7079070	7083549	chr17.7086203-7087433	-1.05529	0.0386455	0.750229	-3884	0.133772	0.696583	0.568695
RAB3A	NM_002866	chr19	-	18168610	18175874	chr19.18180145-18180363	-22.4394	0.0387163	0.750229	-4489	1.58483	0.0545531	0.223666
NRBP2	NM_178564	chr8	-	144987903	144996188	chr8.144995478-144995796	-22.4898	0.0393568	0.753407	392	0.60695	0.18546	0.337233
NPAS2	NM_002518	chr2	+	100803044	100979719	chr2.100801411-100803885	9.17742	0.0394591	0.753407	-1633	-3.40683	0.0148162	0.143689
TUT1	NM_022830	chr11	-	62099092	62115685	chr11.62115389-62116250	-0.625018	0.0395962	0.753407	-565	0.698428	0.171912	0.327796
BRD9	NM_023924	chr5	-	916850	945939	chr5.945522-946479	-1.0947	0.0398067	0.753407	-540	-0.294267	0.45777	0.48534
TRIP13	NM_004237	chr5	+	946003	971160	chr5.945522-946479	-1.0947	0.0398067	0.753407	-481	-0.73916	0.158021	0.316571
C7orf38	NM_145111	chr7	-	98981858	98987652	chr7.98987444-98987743	-0.679864	0.0398931	0.753407	-91	0.384662	0.255899	0.385851
STK32B	NM_018401	chr4	+	5104427	5553626	chr4.5104131-5104993	-47.8044	0.0400573	0.753407	-296	3.91868	0.0107343	0.129587
SYF2	NM_207170	chr1	-	25421353	25431600	chr1.25431150-25431765	-1.52461	0.0401044	0.753407	-165	-0.00813369	0.982624	0.646536
SERHL	NR_027786	chr22	+	41226528	41238509	chr22.41226580-41226985	-53.4382	0.0405489	0.756744	52	-1.01902	0.130637	0.296873
S1PR3	NM_005226	chr9	+	90796181	90809745	chr9.90795584-90795961	-43.0637	0.0405585	0.756744	-597	0.710754	0.487776	0.495822
KHDRBS3	NM_006558	chr8	+	136538897	136729030	chr8.136538608-136539524	-2.33794	0.0407473	0.75836	-289	1.36929	0.455677	0.484453
CXCL14	NM_004887	chr5	-	134934267	134942868	chr5.134942077-134942880	34.6113	0.040781	0.75836	-12	3.21382	0.161263	0.318944
LRRC26	NM_001013653	chr9	-	139183032	139184312	chr9.139181556-139184685	-14.7783	0.0408532	0.75836	-373	2.48516	0.0171212	0.147486
RASL11B	NM_023940	chr4	+	53423251	53427759	chr4.53422794-53423757	-20.2578	0.0411717	0.759455	-457	2.38108	0.106049	0.276672
C8orf73	NM_001100878	chr8	-	144719505	144726071	chr8.144722715-144723431	-49.4694	0.0411721	0.759455	2640	1.04278	0.131372	0.297718
TMEM121	NM_025268	chr14	+	105063997	105067584	chr14.105063544-105067459	-11.039	0.0413553	0.759455	-453	2.14817	0.0894233	0.259479
BTC	NM_001729	chr4	-	75890471	75938906	chr4.75938125-75938764	0.393482	0.0414089	0.759455	142	0.581749	0.508987	0.504603
GNAZ	NM_002073	chr22	+	21742668	21797221	chr22.21742224-21743597	-5.79299	0.0418467	0.763486	-444	1.54547	0.137495	0.302092
ABCD1	NM_000033	chrX	+	152643516	152663410	chrX.152642068-152644913	10.4371	0.0423129	0.767604	-1448	-0.657468	0.422626	0.470404
BCAP31	NR_024450	chrX	-	152619140	152643395	chrX.152642068-152644913	10.4371	0.0423129	0.767604	-1518	-0.0612976	0.907647	0.627938
HEBP2	NM_014320	chr6	+	138767028	138776275	chr6.138766310-138767908	-3.52747	0.0425492	0.769705	-718	-0.448342	0.326518	0.4254
TUBB4	NM_006087	chr19	-	6445329	6453330	chr19.6453090-6453411	-23.6272	0.0428784	0.770904	-81	2.24571	0.0610844	0.231672
GPX1	NM_201397	chr3	-	49369612	49370795	chr3.49369859-49370946	64.6907	0.0428972	0.770904	-151	-5.91802	0.0213411	0.162632
POM121	NM_172020	chr7	+	71987871	72056774	chr7.71987710-71988701	-0.639358	0.0429808	0.771116	-161	0.25677	0.503343	0.501769
HIGD2A	NM_138820	chr5	+	175748389	175749357	chr5.175748803-175749054	-1.51429	0.0433736	0.772204	414	0.225469	0.543985	0.516762
SOX9	NM_000346	chr17	+	67628755	67634155	chr17.67624419-67625866	-25.5955	0.0435977	0.772204	-4336	-2.31976	0.00602871	0.101562
DDX51	NM_175066	chr12	-	131187092	131194833	chr12.131193819-131195422	-1.52368	0.043695	0.772204	-589	0.628739	0.117654	0.286711
NOC4L	NM_024078	chr12	+	131194945	131202939	chr12.131193819-131195422	-1.52368	0.043695	0.772204	-1126	0.359247	0.382396	0.453526
KCNMA1	NM_001014797	chr10	-	78299364	79067583	chr10.79066101-79068501	-48.6571	0.04393	0.773865	-918	4.19553	0.0164117	0.145519
CXCL16	NM_022059	chr17	-	4583576	4589972	chr17.4588787-4590159	-3.29284	0.0440567	0.77431	-187	1.23961	0.490732	0.496833
ZMYND15	NM_001136046	chr17	+	4590067	4596159	chr17.4588787-4590159	-3.29284	0.0440567	0.77431	-1280	1.19511	0.41733	0.468009
ELOVL2	NM_017770	chr6	-	11088978	11152610	chr6.11151899-11153192	-57.5537	0.0441838	0.775122	-582	4.22668	0.0546095	0.223666
STOM	NM_004099	chr9	-	123141173	123172366	chr9.123171878-123172916	-20.0528	0.0445262	0.775447	-550	2.25829	0.0225785	0.164916
FSCN2	NM_012418	chr17	+	77110011	77114632	chr17.77114062-77114657	-1.98994	0.0447501	0.776388	4051	1.71182	0.00207707	0.0626643
BAD	NM_032989	chr11	-	63793876	63808752	chr11.63809152-63810228	-1.10505	0.0448639	0.776388	-1476	-0.060647	0.912201	0.629366
GPR137	NM_020155	chr11	+	63809906	63813539	chr11.63809152-63810228	-1.10505	0.0448639	0.776388	-754	0.0911961	0.845157	0.610493
DISP2	NM_033510	chr15	+	38437725	38450548	chr15.38437347-38438394	-5.12774	0.0451006	0.778771	-378	0.46327	0.715778	0.575089
TXNRD1	NM_001093771	chr12	+	103133688	103268192	chr12.103133527-103134302	56.1343	0.0451599	0.778771	-161	-2.1526	0.0172815	0.147597
PCSK6	NM_002570	chr15	-	99661655	99847710	chr15.99846383-99848131	-12.7041	0.0451643	0.778771	-421	2.32566	0.0680831	0.238234
EFNA4	NM_005227	chr1	+	153302836	153308653	chr1.153301549-153303202	-16.9935	0.0456621	0.778963	-1287	0.889452	0.217373	0.362477
SEMA4C	NM_017789	chr2	-	96889199	96899462	chr2.96897827-96899997	-1.2812	0.0458217	0.778963	-535	0.726684	0.386286	0.455442
PRKCH	NM_006255	chr14	+	60858267	61087451	chr14.60857633-60859220	-7.12329	0.0459138	0.778963	-634	1.02731	0.256249	0.386163
FLJ35220	NM_173627	chr17	+	76003561	76026476	chr17.76003032-76004317	-0.926689	0.0459953	0.778963	-529	0.481953	0.417454	0.468009
PWWP2B	NM_001098637	chr10	+	134060691	134081348	chr10.134059357-134061046	-20.1734	0.0460454	0.778963	-1334	0.264269	0.559626	0.523086
GPR37	NM_005302	chr7	-	124173349	124192917	chr7.124191936-124193425	-7.24155	0.0461277	0.778963	-508	0.395946	0.591517	0.533633
ADARB1	NM_001112	chr21	+	45318920	45470906	chr21.45318601-45319900	-2.88816	0.046173	0.778963	-319	-0.376195	0.511453	0.505317
ZNF764	NM_033410	chr16	-	30472585	30477085	chr16.30480194-30480538	45.6648	0.0461738	0.778963	-3453	1.33755	0.00502201	0.0960699
THOC4	NM_005782	chr17	-	77439008	77442758	chr17.77439500-77439782	-3.16335	0.0461761	0.778963	2976	0.251263	0.519528	0.508217
CHDH	NM_018397	chr3	-	53825427	53855459	chr3.53854761-53855871	-24.138	0.0463181	0.778963	-412	2.94647	0.00501129	0.0960699
IL17RB	NM_018725	chr3	+	53855616	53874867	chr3.53854761-53855871	-24.138	0.0463181	0.778963	-855	1.7158	0.0162801	0.145519
KIAA1024	NM_015206	chr15	+	77511912	77551697	chr15.77511154-77512698	-48.1717	0.0464518	0.778963	-758	-0.906724	0.190781	0.343193
ENDOG	NM_004435	chr9	+	130620599	130624776	chr9.130620411-130621422	-3.22061	0.0465122	0.778963	-188	0.498746	0.285238	0.40266
ANKH	NM_054027	chr5	-	14757908	14924887	chr5.14925206-14925572	10.2471	0.0465494	0.778963	-685	-3.92879	0.000601566	0.0409852
ERN1	NM_001433	chr17	-	59474121	59561234	chr17.59560703-59561782	5.36847	0.0471841	0.780339	-548	0.60618	0.299608	0.410319
CGGBP1	NM_003663	chr3	-	88183789	88190836	chr3.88190237-88191196	0.742578	0.0472571	0.780339	-360	0.442721	0.256621	0.386436
STAM2	NM_005843	chr2	-	152681560	152740752	chr2.152740179-152741141	-0.938028	0.0474425	0.780339	-389	0.214389	0.566088	0.525369
EIF4E3	NM_173359	chr3	-	71811131	71886614	chr3.71885247-71886896	-34.4526	0.0475009	0.780339	-282	0.950379	0.275035	0.396632
GPR27	NM_018971	chr3	+	71885890	71887018	chr3.71885247-71886896	-34.4526	0.0475009	0.780339	-643	2.57913	0.176891	0.330678
ID2	NM_002166	chr2	+	8739563	8742034	chr2.8742557-8743639	-8.49557	0.0475481	0.780339	2994	4.08647	0.00923303	0.122554
FXYD6	NM_022003	chr11	-	117212902	117252577	chr11.117252312-117252927	-13.5274	0.0477519	0.780339	-350	1.4653	0.165155	0.322185
POLD2	NM_006230	chr7	-	44120810	44129672	chr7.44129375-44130245	-26.1914	0.0478428	0.780339	-573	0.0187293	0.966053	0.642807
CLUAP1	NM_015041	chr16	+	3490963	3526586	chr16.3490774-3491275	-8.10724	0.047928	0.780339	-189	1.85514	0.000468669	0.0371298
NCL	NM_005381	chr2	-	232027702	232037449	chr2.232036689-232038393	-2.74518	0.0480189	0.780339	-944	-0.0350965	0.936302	0.635769
TRH	NM_007117	chr3	+	131175803	131179466	chr3.131175814-131177528	6.41932	0.0482811	0.780339	11	5.43813	0.000128818	0.0171213
SEMA6A	NM_020796	chr5	-	115807149	115938450	chr5.115936296-115938691	-39.8727	0.0483991	0.780339	-241	3.18338	0.0104821	0.128765
KCNK6	NM_004823	chr19	+	43502323	43511489	chr19.43502216-43502789	-8.76573	0.0485734	0.780339	-107	3.38505	0.00220551	0.064477
YIF1B	NM_001145463	chr19	-	43486039	43498446	chr19.43502216-43502789	-8.76573	0.0485734	0.780339	-4343	-0.701363	0.116901	0.286116
MACF1	NM_012090	chr1	+	39319704	39725376	chr1.39319600-39320546	-15.0712	0.0486504	0.780339	-104	-2.03128	0.0230882	0.165361
TMED2	NM_006815	chr12	+	122635028	122648641	chr12.122634888-122635652	-0.381435	0.048681	0.780339	-140	1.01184	0.062841	0.232727
ADARB1	NM_001112	chr21	+	45318920	45470906	chr21.45317357-45317598	-9.63101	0.0490708	0.780339	-1563	-0.376195	0.511453	0.505317
SH3RF1	NM_020870	chr4	-	170251981	170428824	chr4.170427932-170429419	1.36069	0.0492681	0.780339	-595	-0.50928	0.217105	0.362391
RICH2	NM_014859	chr17	+	12633553	12835685	chr17.12633462-12634415	-13.7148	0.0497615	0.780339	-91	3.51644	0.0309622	0.179671
SPATA7	NM_018418	chr14	+	87921764	87974557	chr14.87921636-87922038	-0.345731	0.0497643	0.780339	-128	1.63041	0.00279541	0.0717214
EFCAB6	NM_198856	chr22	-	42255986	42539451	chr22.42539280-42539745	-2.00798	0.0499015	0.780339	-294	1.89331	0.136028	0.301735
ARG2	NM_001172	chr14	+	67156331	67188189	chr14.67156030-67156710	-1.78191	0.0499042	0.780339	-301	0.571614	0.295096	0.408208
TPPP	NM_007030	chr5	-	712976	746510	chr5.745681-747377	-4.66592	0.0499165	0.780339	-867	0.814073	0.489796	0.496577
